# Supplementary material for: Synthesis, characterization and catalytic activity of rare-earth metal amides incorporating cyclohexyl bridged bis(β-diketiminato) ligands
Source: Royal Society of Chemistry journal article supplement (doi:10.1039/c7ra07565k), 2017-01-01
Supplement: c7ra07565k1.pdf [file c7ra07565k1.pdf]

## Electronic Supplementary Information

### Synthesis, characterization and catalytic activity of rare-earth metal amides incorporating cyclohexyl bridged bis( $\beta$ -diketiminato) ligands

Hui Miao,<sup>a,b</sup> Shaowu Wang,<sup>\*,a,c</sup> Xiancui Zhu,<sup>\*,a</sup> Shuangliu Zhou,<sup>a</sup> Yun Wei,<sup>a</sup> Qingbing Yuan<sup>a</sup> and Xiaolong Mu<sup>a</sup>

<sup>a</sup>Laboratory of Functional Molecular Solids, Ministry of Education, Anhui Laboratory of Molecule-Based Materials, College of Chemistry and Materials Science, Anhui Normal University, Wuhu, Anhui 241000, P. R. China. <sup>b</sup>School of Chemistry and Materials Engineering, Fuyang Normal College, Fuyang, Anhui 236037, P. R. China. <sup>c</sup>State Key Laboratory of Organometallic Chemistry, Shanghai Institute of Organic Chemistry, Chinese Academy of Sciences, Shanghai 200032, P. R. China

E-mail: [swwang@ahnu.edu.cn](mailto:swwang@ahnu.edu.cn); [zxc0805@ahnu.edu.cn](mailto:zxc0805@ahnu.edu.cn)

|                                                                                                                                      |     |
|--------------------------------------------------------------------------------------------------------------------------------------|-----|
| I. X-ray crystallographic analysis of complexes <b>1a-c</b> .....                                                                    | S2  |
| II. General procedure for hydrophosphination of $\beta$ -nitroalkene and $\alpha$ , $\beta$ -unsaturated carbonyl derivatives.....   | S4  |
| III. Data of <sup>1</sup> H NMR and <sup>13</sup> C NMR Spectra for compounds <b>4a-n</b> .....                                      | S4  |
| IV. Copies of <sup>1</sup> H NMR and <sup>13</sup> C NMR Spectra for complexes <b>1d</b> , <b>2e</b> and compounds <b>4a-n</b> ..... | S8  |
| V. Crystallographic Data for Complexes <b>1a-d</b> .....                                                                             | S24 |

## I. X-ray crystallographic analysis of complexes **1a-c**

The single crystal X-ray diffraction data for complexes **1a-1c** were collected on a CCD area diffractometer with graphite monochromated *Mo K $\alpha$*  radiation ( $\lambda = 0.71073 \text{ \AA}$ ); temperature 273(2) K. Saint program and *SADABS* program carried out the data integration. The structures were solved by a direct method and refined on  $F^2$  using SHELXTL suite of program. All non-hydrogen atoms were anisotropically refined by full-matrix least squares methods. All hydrogen atoms were geometrically generated and isotropically refined using a riding model. The crystal structures of **1a-1c** are given in Figure S1-S3.

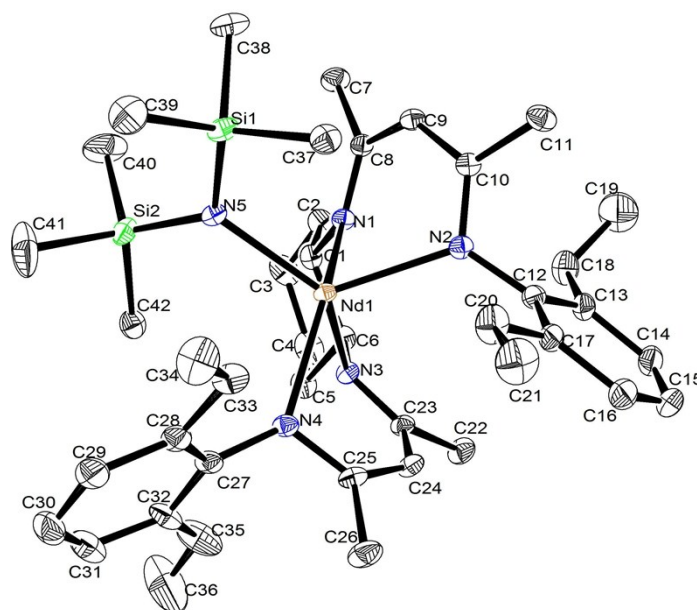

Figure S1. Molecular structure of complex **1a**. Hydrogen atoms were omitted for clarity.

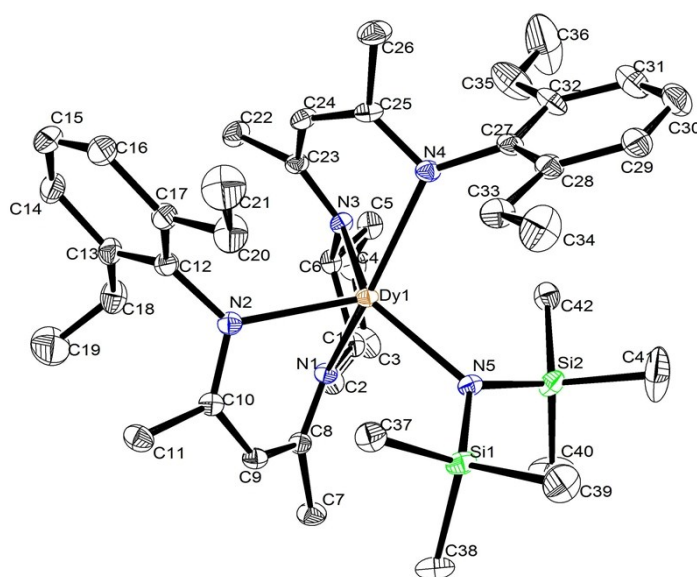

Figure S2. Molecular structure of complex **1b**. Hydrogen atoms were omitted for clarity.

clarity.

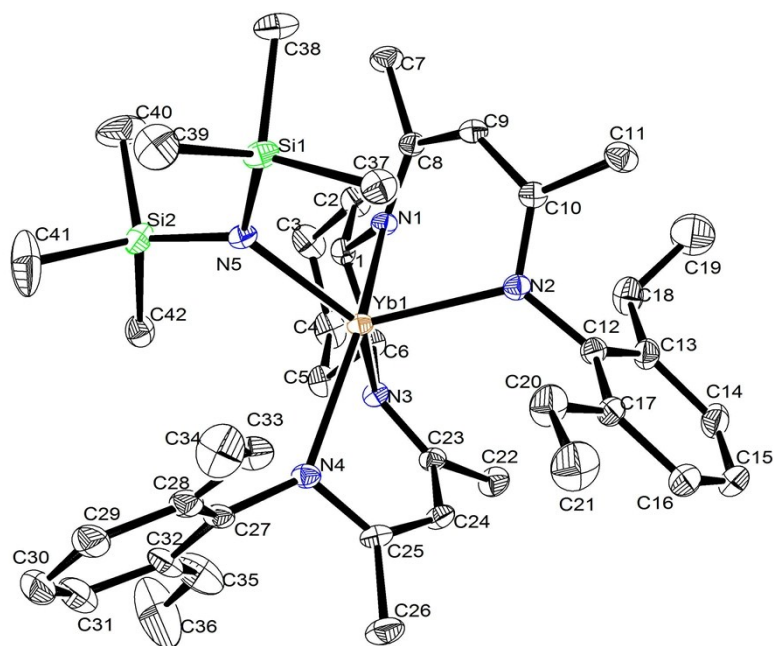

Figure S3. Molecular structure of complex **1c**. Hydrogen atoms were omitted for clarity.

## II. General procedure for hydrophosphination of $\beta$ -nitroalkene and $\alpha,\beta$ -unsaturated carbonyl derivatives (4a as an example).

A 30.0 mL Schlenk tube under dried argon was charged with complex **1d** (11.8 mg, 0.015 mmol), diphenylphosphine oxide (0.101 g, 0.5 mmol), and 5.0 mL of toluene, and then  $\beta$ -nitrostyrene (0.075 g, 0.5 mmol) was added to the mixture. The mixture was stirred at room temperature for 6 hours. After the reaction was completed, the reaction mixture was hydrolyzed by water, extracted with ethyl ether, dried over anhydrous sodium sulfate, and then filtered. After the solvent was removed under reduced pressure, the final products were further purified by recrystallization from ethyl acetate or column chromatography. Compound **4a** was isolated as white solid (0.167 g, 95%).

## III. Data of $^1\text{H}$ NMR and $^{13}\text{C}$ NMR for compounds 4a-n

compound **4a**

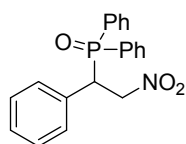

$^1\text{H}$  NMR (300 MHz,  $\text{CDCl}_3$ , 25 °C, ppm):  $\delta$  = 8.00-7.94 (m, 2H), 7.62-7.59 (m, 3H), 7.45-7.36 (m, 3H), 7.28-7.19 (m, 7H), 5.10-5.05 (m, 1H, CHP), 4.78-4.72 (m, 1H,  $\text{CH}_2\text{CH}$ ), 4.44-4.39 (m, 1H,  $\text{CH}_2\text{CH}$ );  $^{13}\text{C}$  NMR (75 MHz,  $\text{CDCl}_3$ , 25 °C, ppm):  $\delta$  = 132.8, 132.1, 131.7, 131.3, 131.1, 131.0, 130.7, 129.5, 129.3, 128.8, 128.4, 128.3, 75.8, 75.7, 46.3, 45.4.

compound **4b**

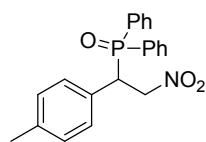

$^1\text{H}$  NMR (300 MHz,  $\text{CDCl}_3$ , 25 °C, ppm):  $\delta$  8.00-7.94(m, 2H), 7.62-7.59(m, 2H), 7.50-7.38(m, 3H), 7.31-7.26(m, 3H), 7.18-7.15(m, 2H), 7.03-7.00(m, 2H), 5.12-5.02(m, 1H,  $\text{CH}_2$ ), 4.76-4.70(m, 1H, CHP), 4.43-4.34(dt, 1H,  $\text{CH}_2$ ), 2.25(m, 3H,  $\text{CH}_3$ ).  $^{13}\text{C}$  NMR (75 MHz,  $\text{CDCl}_3$ , 25 °C, ppm):  $\delta$  = 132.8, 131.7, 131.2, 130.1, 129.8, 129.7, 129.6, 128.7, 128.2, 127.5, 127.4, 127.3, 76.0, 75.9, 45.9, 45.0, 21.1.

compound **4c**

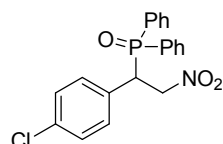

$^1\text{H}$  NMR (300 MHz,  $\text{CDCl}_3$ , 25 °C, ppm):  $\delta$  = 8.05-7.98 (m, 2H), 7.68-7.65 (m, 3H), 7.54-7.47 (m, 3H), 7.39-7.25 (m, 5H), 5.12-5.05 (m, 1H, CHP), 4.80-4.74 (m, 1H,  $\text{CH}_2\text{CH}$ ), 4.47-4.42 (m, 1H,  $\text{CH}_2\text{CH}$ );  $^{13}\text{C}$  NMR (75 MHz,  $\text{CDCl}_3$ , 25 °C, ppm):  $\delta$  = 131.9, 131.6, 131.3, 130.0, 129.9, 129.7, 129.6, 128.5, 128.0, 127.8, 127.6, 127.4, 74.6, 44.6, 43.8.

compound **4d**

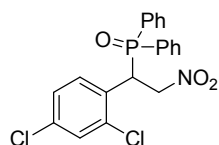

$^1\text{H NMR}$  (300 MHz,  $\text{CDCl}_3$ , 25 °C, ppm):  $\delta = 7.94\text{-}7.79$  (m, 2H), 7.76-7.73 (m, 1H), 7.59-7.54 (m, 3H), 7.40-7.33 (m, 3H), 7.24-7.18 (m, 3H), 7.11-7.09 (m, 1H), 5.12-4.94(m, 2H), 4.70-4.62(m, 1H,  $\text{CH}_2\text{CH}$ ).  $^{13}\text{C NMR}$  (75 MHz,  $\text{CDCl}_3$ , 25 °C, ppm):  $\delta = 135.6, 135.5, 134.7, 131.2, 131.1, 130.9, 130.7, 130.4, 129.9, 129.6, 129.5, 129.4, 129.0, 128.8, 128.7, 128.4, 128.3, 127.9, 75.3, 40.9, 40.1$ .

**compound 4e**

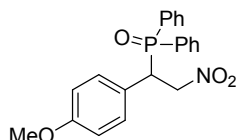

$^1\text{H NMR}$  (300 MHz,  $\text{CDCl}_3$ , 25 °C, ppm):  $\delta = 7.93\text{-}7.87$  (m, 2H), 7.55-7.52(m, 2H), 7.40-7.35 (m, 3H), 7.25-7.12 (m, 5H), 6.69-6.66 (m, 2H), 5.01-4.94 (m, 1H, CHP), 4.66-4.62 (m, 1H,  $\text{CH}_2\text{CH}$ ), 4.33-4.26 (m, 1H,  $\text{CH}_2\text{CH}$ ), 3.67 (s, 3H,  $\text{CH}_3\text{O}$ );  $^{13}\text{C NMR}$  (75 MHz,  $\text{CDCl}_3$ , 25 °C, ppm):  $\delta = 159.9, 131.7, 131.1, 130.2, 130.0, 128.4, 128.2, 127.4, 127.3, 122.6, 121.0, 111.2, 110.1, 74.9, 55.6, 45.7, 45.2$ .

**compound 4f**

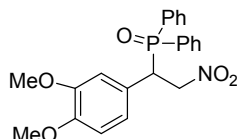

$^1\text{H NMR}$  (300 MHz,  $\text{CDCl}_3$ , 25 °C, ppm):  $\delta = 7.94\text{-}7.88$  (m, 2H), 7.56-7.54(m, 2H), 7.40-7.35 (m, 3H), 7.26-7.19 (m, 3H), 6.72-6.65 (m, 3H), 5.05-4.95 (m, 1H, CHP), 4.68-4.64 (m, 1H,  $\text{CH}_2\text{CH}$ ), 4.32-4.25 (m, 1H,  $\text{CH}_2\text{CH}$ ), 3.74 (s, 3H,  $\text{CH}_3\text{O}$ ), 3.66 (s, 3H,  $\text{CH}_3\text{O}$ );  $^{13}\text{C NMR}$  (75 MHz,  $\text{CDCl}_3$ , 25 °C, ppm):  $\delta = 147.9, 131.7, 131.1, 130.1, 130.0, 129.8, 128.4, 128.2, 127.4, 127.3, 122.6, 121.0, 111.2, 111.2, 110.1, 74.9, 54.8, 54.7, 44.9, 44.0$ .

**compound 4g**

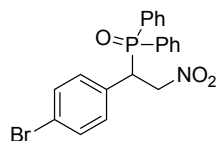

$^1\text{H NMR}$  (300 MHz,  $\text{CDCl}_3$ , 25 °C, ppm):  $\delta = 7.90\text{-}7.87$  (m, 2H), 7.56-7.51 (m, 3H), 7.43-7.28 (m, 3H), 7.26-7.19 (m, 4H), 7.10-7.09 (m, 2H), 5.02-4.92 (m, 1H, CHP), 4.67-4.60 (m, 1H,  $\text{CH}_2\text{CH}$ ), 4.34-4.26 (m, 1H,  $\text{CH}_2\text{CH}$ );  $^{13}\text{C NMR}$  (75 MHz,  $\text{CDCl}_3$ , 25 °C, ppm):  $\delta = 132.9, 132.4, 132.0, 131.2, 131.1, 130.9, 130.4, 130.0, 129.4, 128.6, 128.5, 122.6, 75.6, 45.7, 44.9$ .

**compound 4h**

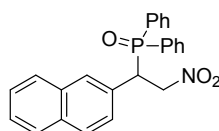

$^1\text{H NMR}$  (300 MHz,  $\text{CDCl}_3$ , 25 °C, ppm):  $\delta = 8.03\text{-}6.90$  (m, 17H), 5.36 (m, 1H, CHP), 5.20 (m, 1H,  $\text{CH}_2\text{CH}$ ), 4.90 (m, 1H,  $\text{CH}_2\text{CH}$ );  $^{13}\text{C NMR}$  (75 MHz,  $\text{CDCl}_3$ , 25 °C, ppm):  $\delta = 132.9, 132.8, 131.9, 131.4, 130.7, 130.6, 129.4, 129.3, 128.9, 128.0, 127.8, 126.9, 126.5, 125.6, 125.4, 121.9, 76.3, 39.4, 38.6$ .

compound **4i**

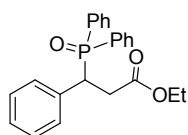

$^1\text{H NMR}$  (300 MHz,  $\text{CDCl}_3$ , 25 °C, ppm):  $\delta$  = 7.93-7.88 (m, 2H), 7.52-7.40 (m, 5H), 7.38-7.11 (m, 8H), 4.07-3.99 (m, 1H, CHP), 3.91-3.84 (m, 2H,  $\text{CH}_2\text{CH}_3$ ), 3.09-3.00 (m, 1H,  $\text{CH}_2\text{CH}$ ), 2.89-2.83 (m, 1H,  $\text{CH}_2\text{CH}$ ), 0.99 (m, 3H,  $\text{CH}_3\text{CH}_2$ );  $^{13}\text{C NMR}$  (75 MHz,  $\text{CDCl}_3$ , 25 °C, ppm):  $\delta$  = 170.2, 134.0, 131.0, 130.4, 130.1, 130.0, 129.6, 128.7, 127.9, 127.8, 127.2, 127.1, 127.0, 126.2, 59.8, 41.9 (d,  $J_{\text{C-P}}$  = 67.7 Hz), 33.9, 12.9.

compound **4j**

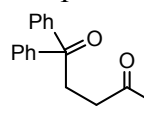

$^1\text{H NMR}$  (300 MHz,  $\text{CDCl}_3$ , 25 °C, ppm):  $\delta$  = 7.69-7.63 (m, 4H), 7.47-7.39 (m, 6H), 6.35 (m, 1H, NH), 3.88 (m, 1H,  $\text{CHCH}_3$ ), 2.60-2.52 (m, 2H,  $\text{CH}_2\text{CO}$ ), 2.45-2.38 (m, 2H,  $\text{CH}_2\text{PO}$ ), 1.06-1.02 (m, 6H,  $\text{CH}_3\text{CH}$ );  $^{13}\text{C NMR}$  (75 MHz,  $\text{CDCl}_3$ , 25 °C, ppm):  $\delta$  = 170.4, 133.0, 132.0, 131.9, 131.7, 130.7, 130.6, 128.8, 128.7, 41.4, 28.0, 25.2 (d,  $J_{\text{C-P}}$  = 72.8 Hz), 22.6.

compound **4k**

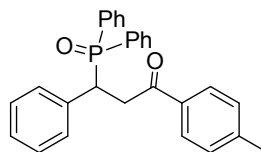

$^1\text{H NMR}$  (300 MHz,  $\text{CDCl}_3$ , 25 °C, ppm):  $\delta$  = 7.91 (m, 2H), 7.69-7.66 (m, 3H), 7.45-7.04 (m, 14H), 4.42-4.37 (m, 1H, CHP), 3.97-3.88 (m, 1H,  $\text{CH}_2\text{CH}$ ), 3.32-3.22 (m, 1H,  $\text{CH}_2\text{CH}$ ), 2.27 (s, 3H,  $\text{CH}_3$ );  $^{13}\text{C NMR}$  (75 MHz,  $\text{CDCl}_3$ , 25 °C, ppm):  $\delta$  = 195.2 (d,  $J_{\text{C-P}}$  = 10.4 Hz), 143.2, 134.9, 132.9, 131.6, 131.0, 130.4, 130.2, 130.0, 129.9, 129.6, 128.8, 128.2, 128.0, 127.8, 127.2, 127.0, 126.0, 40.0 (d,  $J_{\text{C-P}}$  = 68.6 Hz), 37.8, 20.6.

compound **4l**

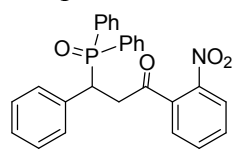

$^1\text{H NMR}$  (300 MHz,  $\text{CDCl}_3$ , 25 °C, ppm):  $\delta$  = 8.56 (s, 1H), 8.27 (m, 1H), 8.07 (m, 1H), 7.91 (m, 2H), 7.54-7.19 (m, 11H), 7.12-7.07 (m, 3H), 4.37 (m, 1H, CHP), 3.94-3.87 (m, 1H,  $\text{CH}_2\text{CH}$ ), 3.43-3.38 (m, 1H,  $\text{CH}_2\text{CH}$ );  $^{13}\text{C NMR}$  (75 MHz,  $\text{CDCl}_3$ , 25 °C, ppm):  $\delta$  = 194.9 (d,  $J_{\text{C-P}}$  = 10.5 Hz), 148.4, 135.6, 133.6, 131.6, 131.4, 131.3, 131.0, 130.9, 129.9, 129.8, 129.7, 129.1, 129.0, 128.5, 128.2, 128.1, 127.5, 127.3, 123.0, 41.3 (d,  $J_{\text{C-P}}$  = 68.2 Hz), 39.4.

compound **4m**

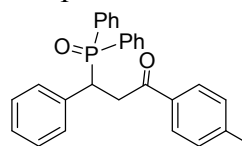

$^1\text{H NMR}$  (300 MHz,  $\text{CDCl}_3$ , 25 °C, ppm):  $\delta$  = 7.93-7.87 (m, 2H), 7.71-7.69 (m, 2H), 7.46-7.18 (m, 12H), 7.08-7.05 (m, 3H), 4.39-4.34 (m, 1H, CHP),

3.95-3.84 (m, 1H, CH<sub>2</sub>CH), 3.33-3.23 (m, 1H, CH<sub>2</sub>CH); <sup>13</sup>C NMR (75 MHz, CDCl<sub>3</sub>, 25 °C, ppm): δ = 194.6 (d, J<sub>C-P</sub> = 12.3 Hz), 138.8, 134.7, 134.0, 131.1, 130.5, 130.3, 130.2, 130.0, 129.9, 129.6, 128.8, 128.7, 128.5, 128.0, 127.8, 127.3, 127.1, 127.0, 40.0 (d, J<sub>C-P</sub> = 68.6 Hz), 37.9.

compound **4n**

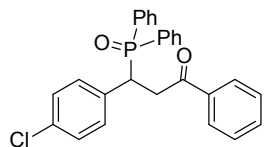

<sup>1</sup>H NMR (300 MHz, CDCl<sub>3</sub>, 25 °C, ppm): δ = 7.92-7.87 (m, 2H), 7.78-7.65 (m, 2H), 7.65-7.22 (m, 12H), 7.06-7.03 (m, 3H), 4.39-4.34 (m, 1H, CHP), 3.95-3.84 (m, 1H, CH<sub>2</sub>CH), 3.32-3.23 (m, 1H, CH<sub>2</sub>CH); <sup>13</sup>C NMR (75 MHz, CDCl<sub>3</sub>, 25 °C, ppm): δ = 195.4 (d, J<sub>C-P</sub> = 13.3 Hz), 132.5, 131.1, 130.6, 130.2, 130.1, 130.0, 129.9, 129.8, 128.1, 127.9, 127.8, 127.6, 127.5, 127.3, 127.2, 127.1, 39.4 (d, J<sub>C-P</sub> = 68.5 Hz), 37.9.

#### IV. Copies of $^1\text{H}$ NMR and $^{13}\text{C}$ NMR for complexes 1d, 2e and compounds 4a-n

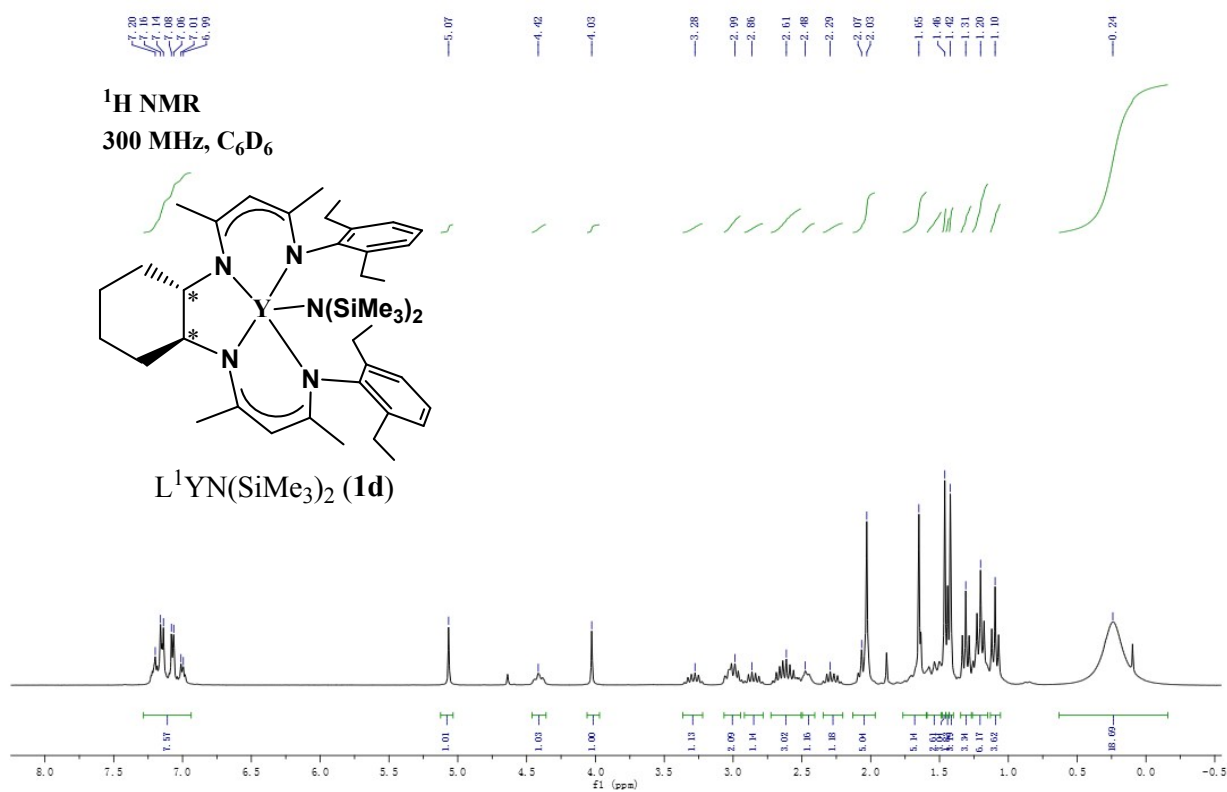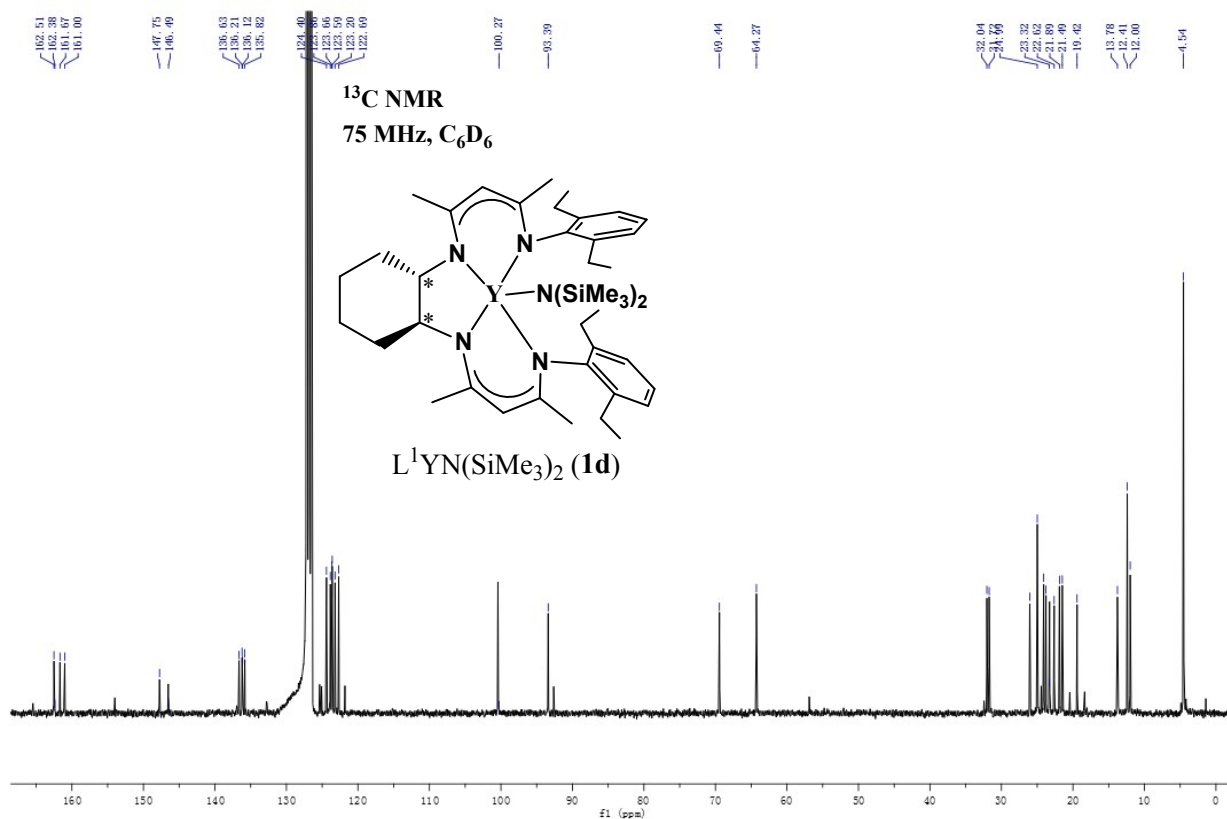



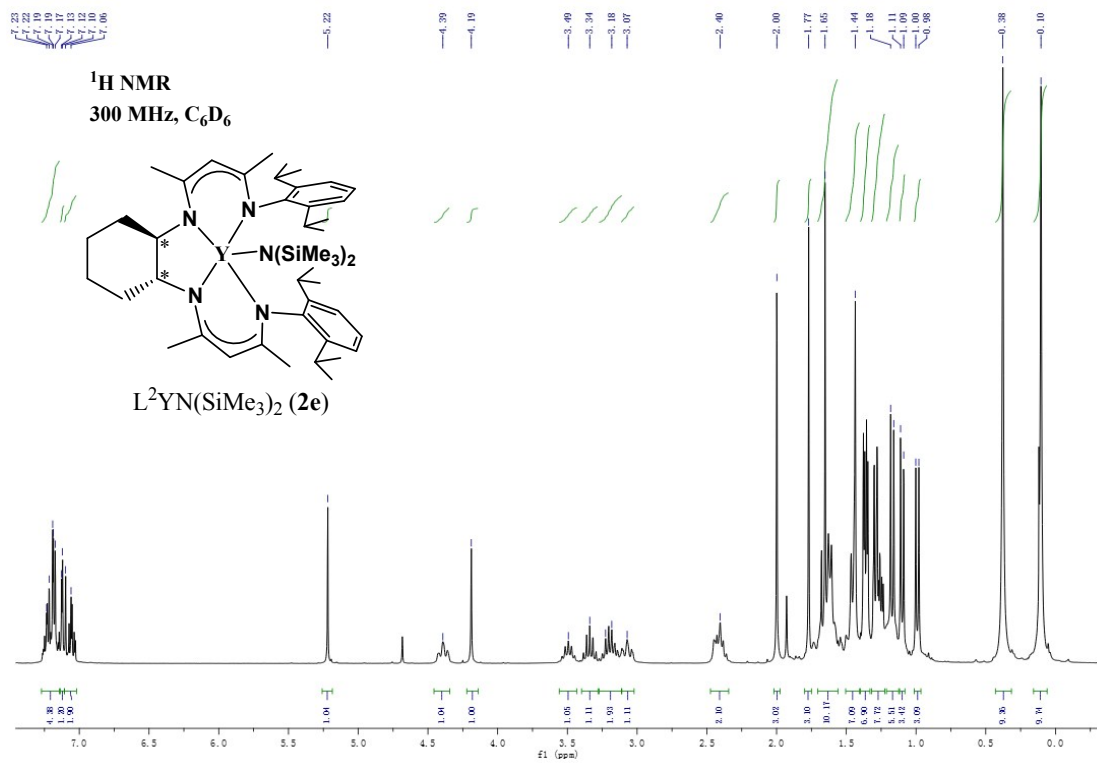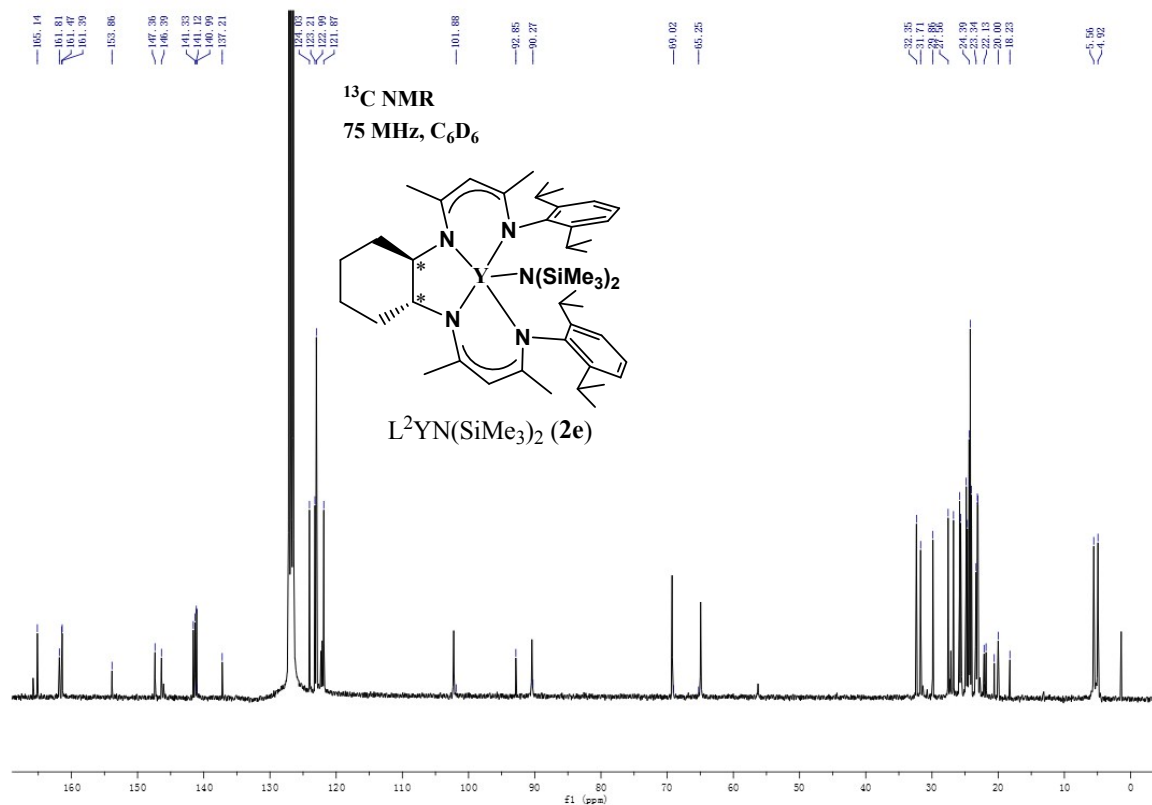

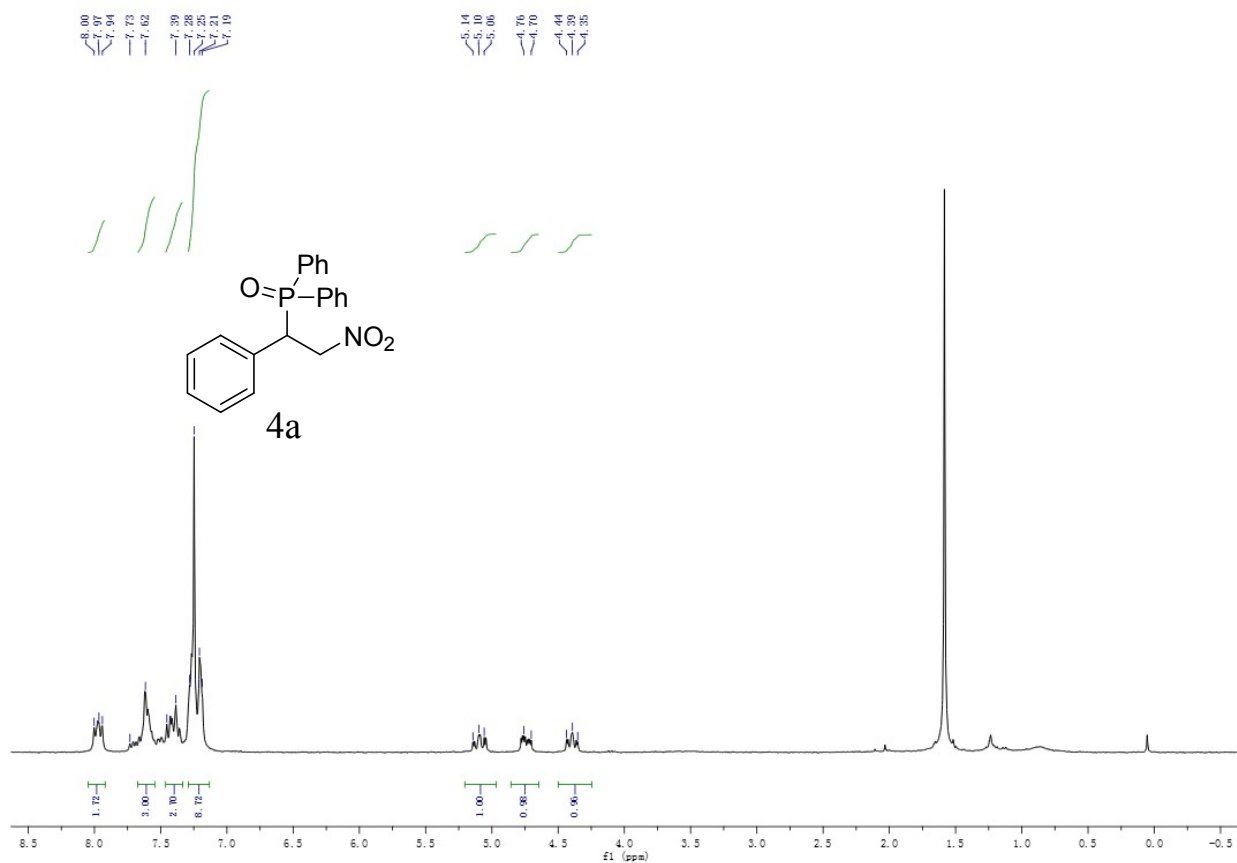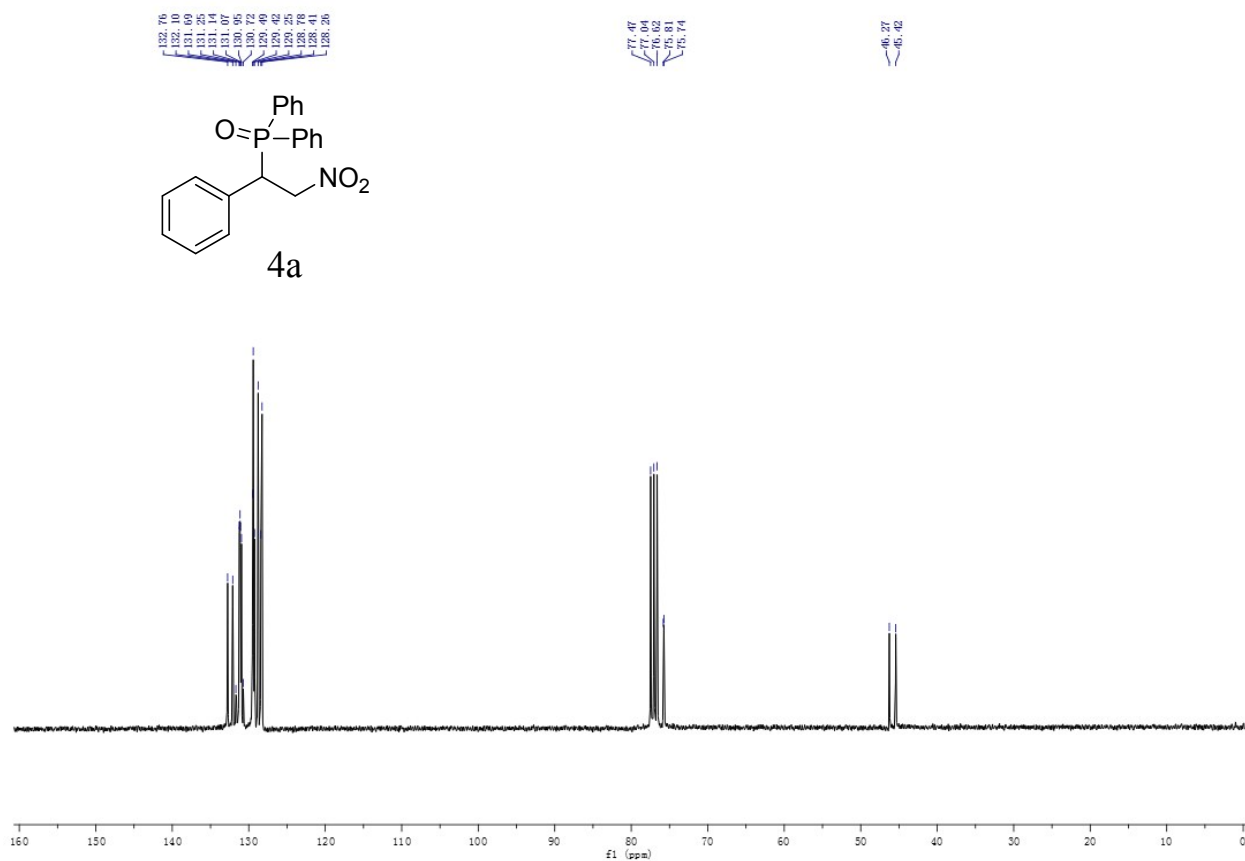

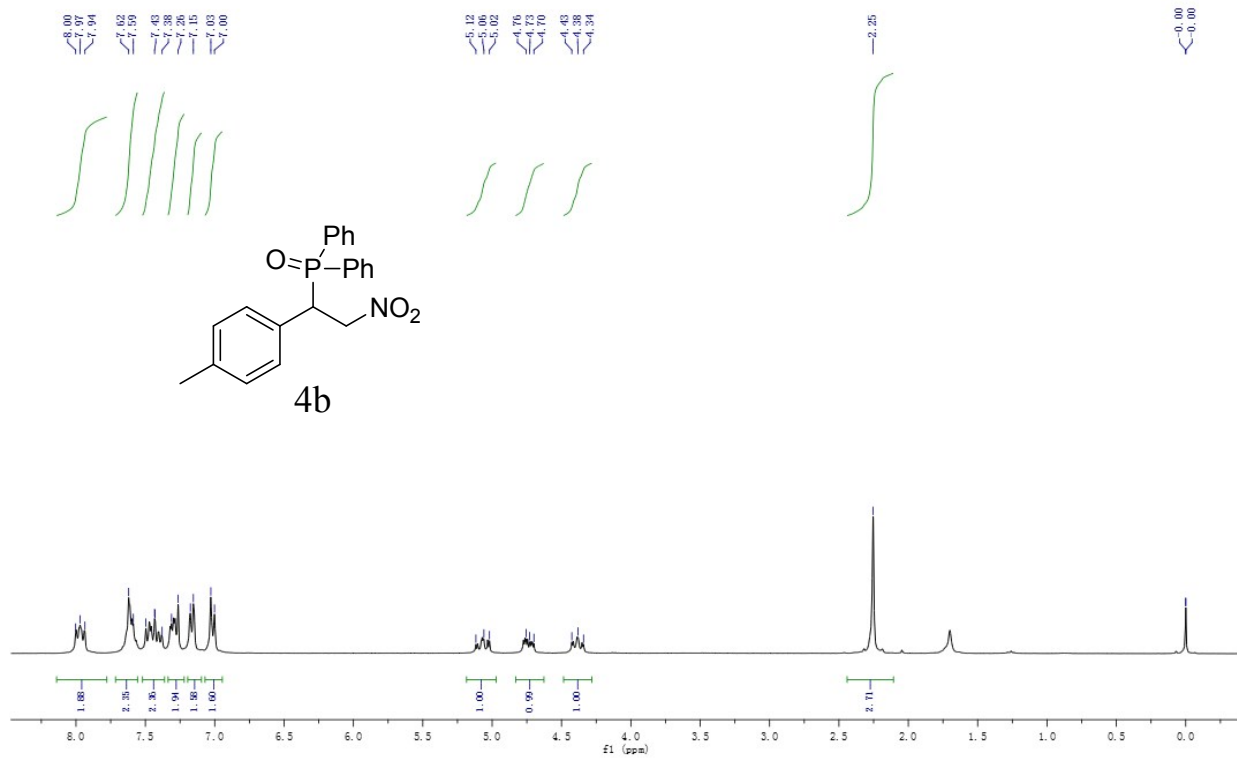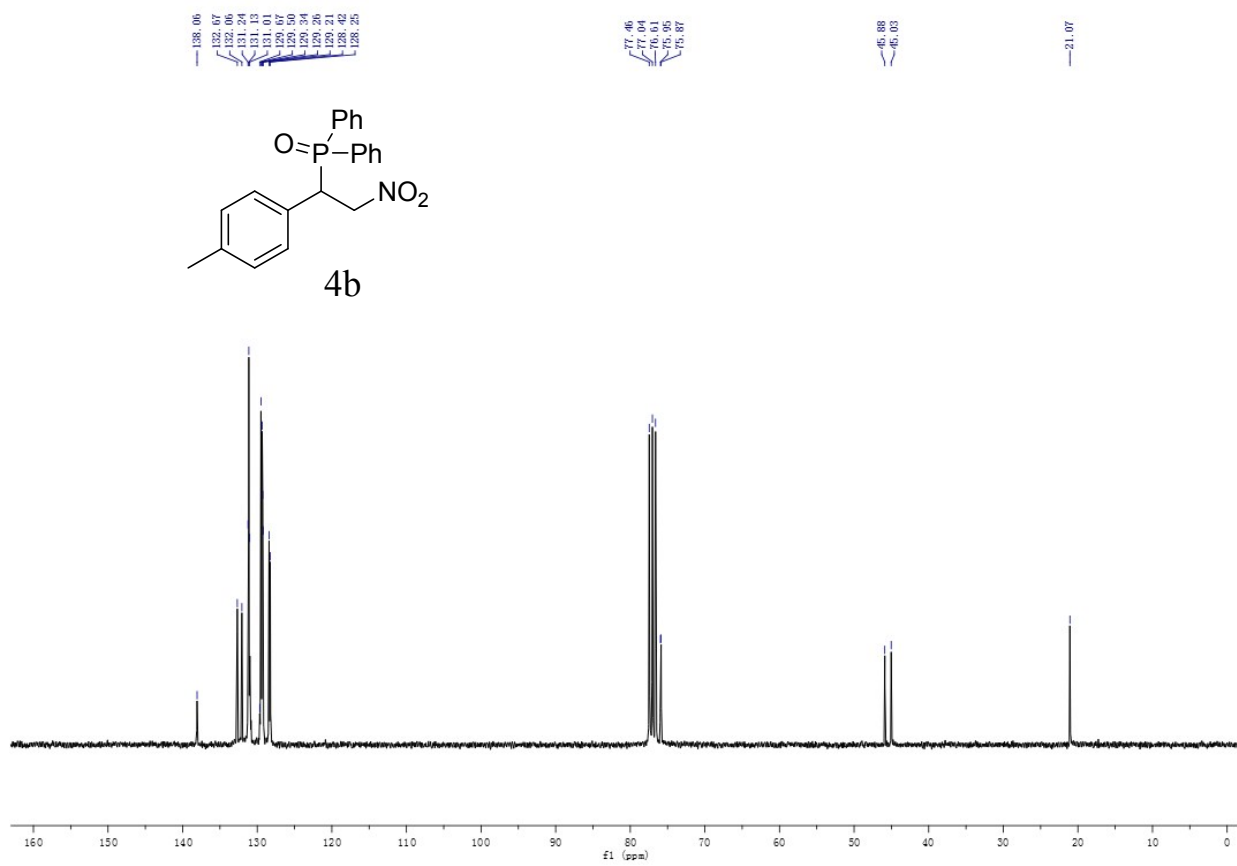

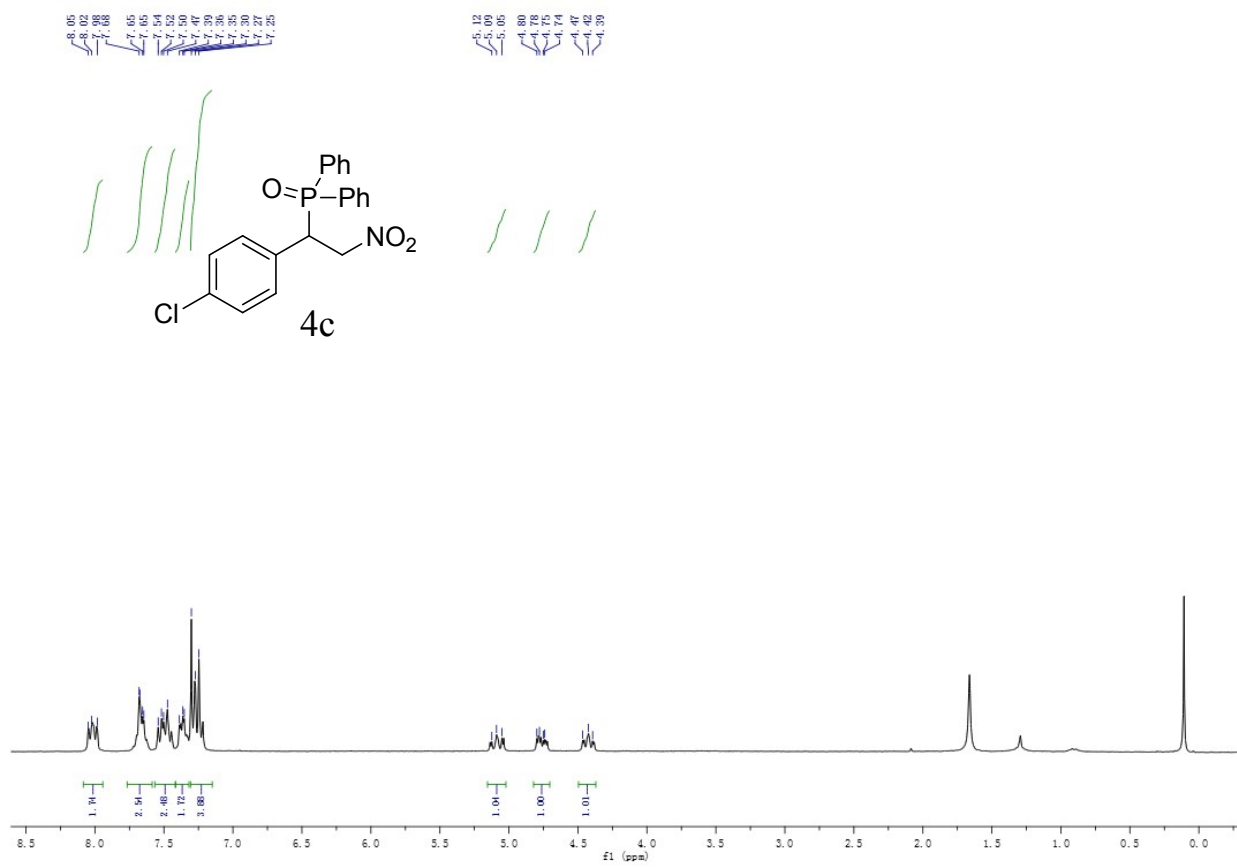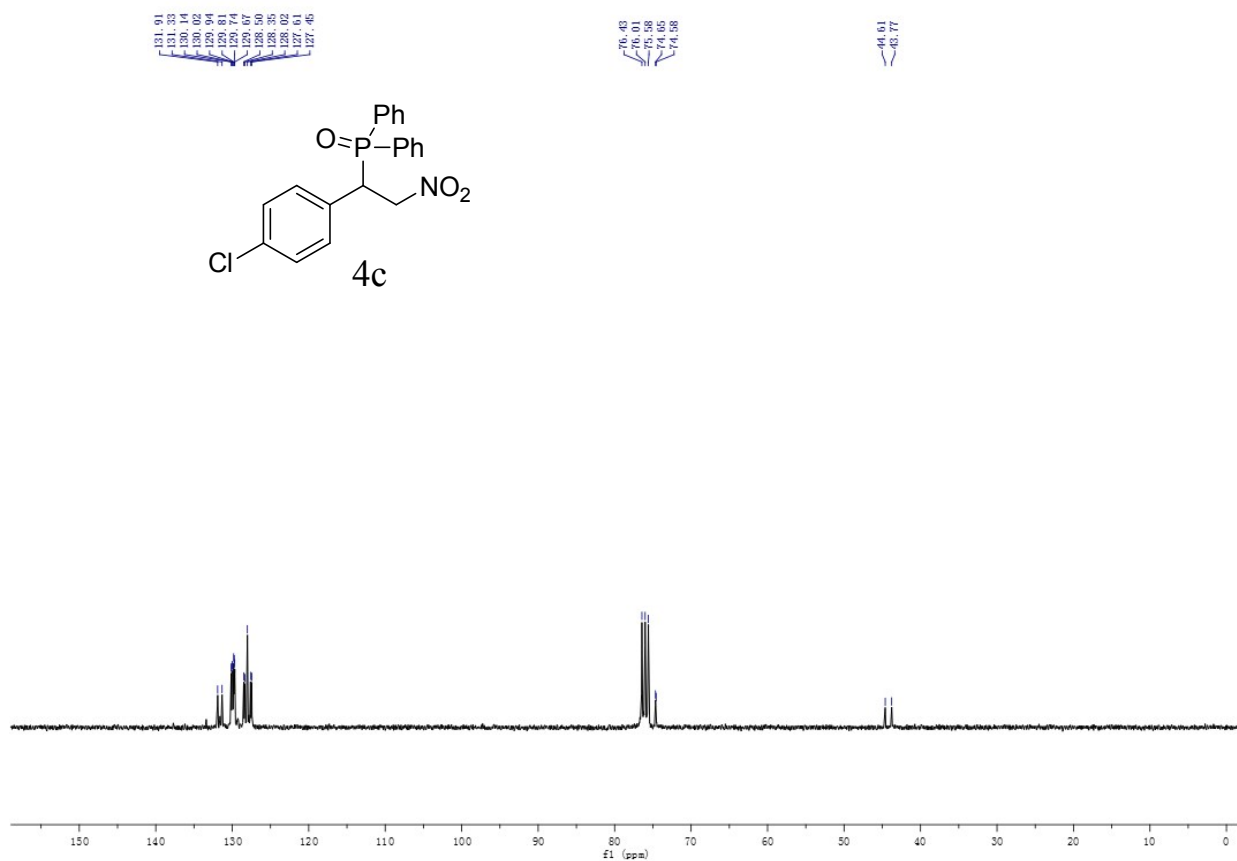

7.97  
7.96  
7.96  
7.94  
7.73  
7.59  
7.54  
7.40  
7.37  
7.36  
7.35  
7.24  
7.24  
7.22  
7.21  
7.18  
7.11  
5.12  
5.11  
5.09  
5.08  
5.06  
5.05  
5.03  
5.02  
5.02  
4.98  
4.97  
4.95  
4.94  
4.70  
4.68  
4.67  
4.65  
4.64  
4.62

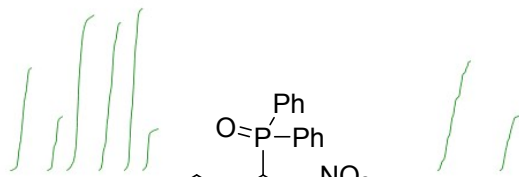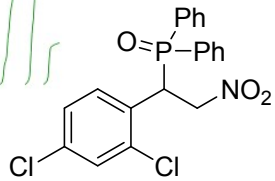

4d

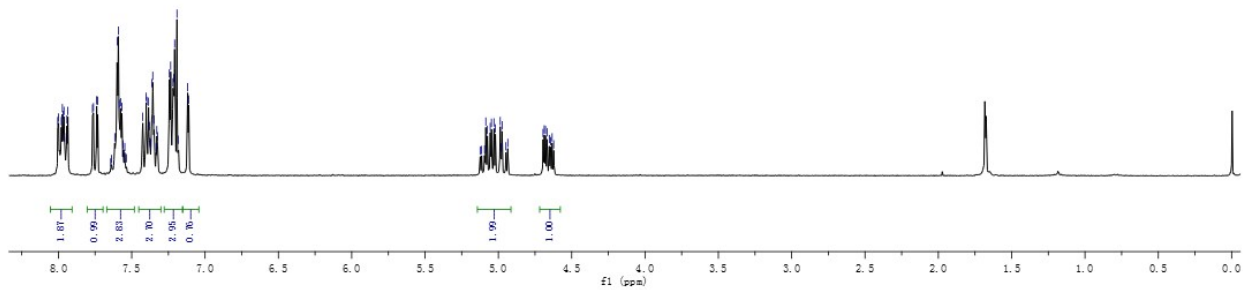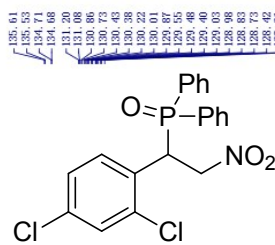

4d

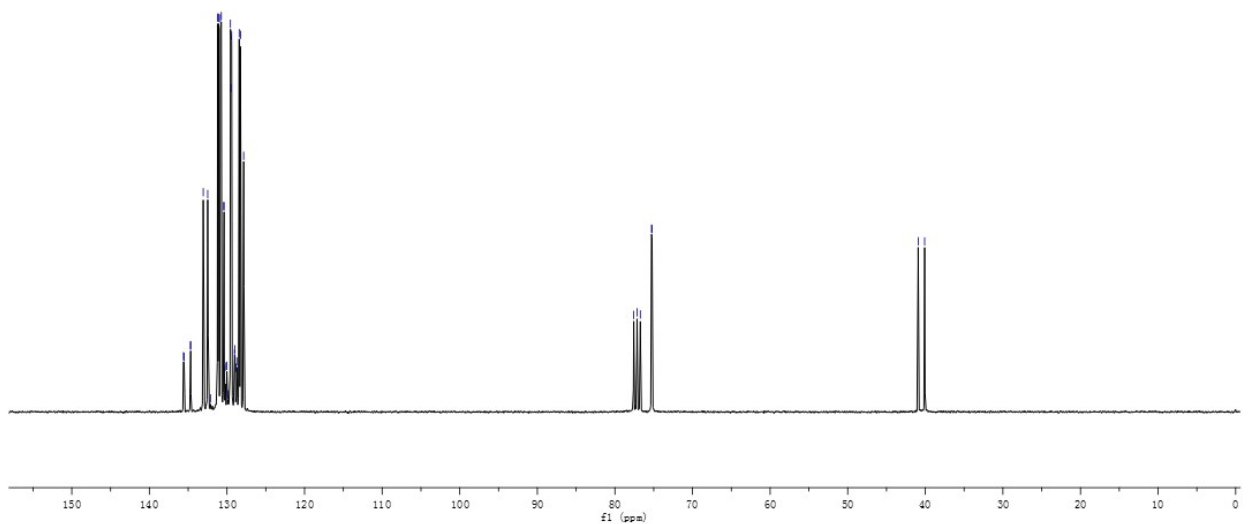

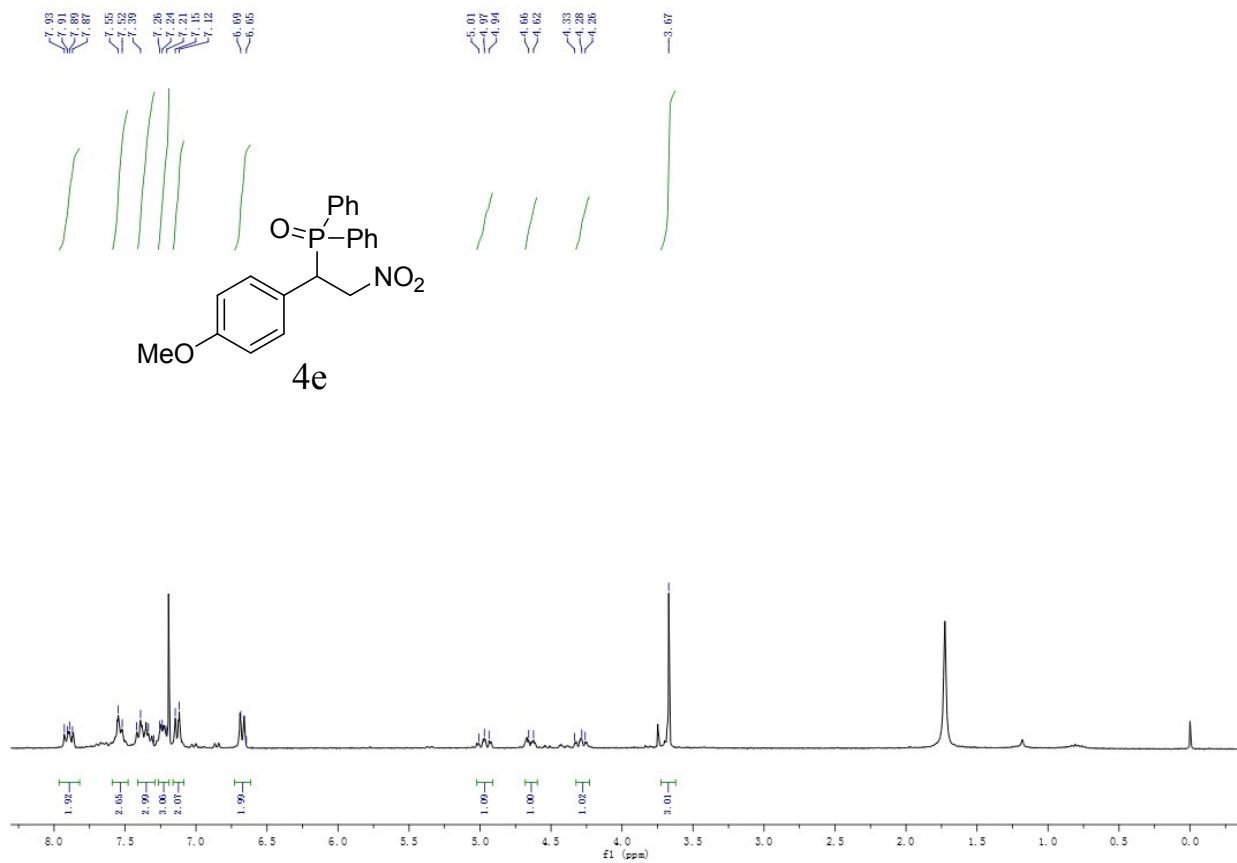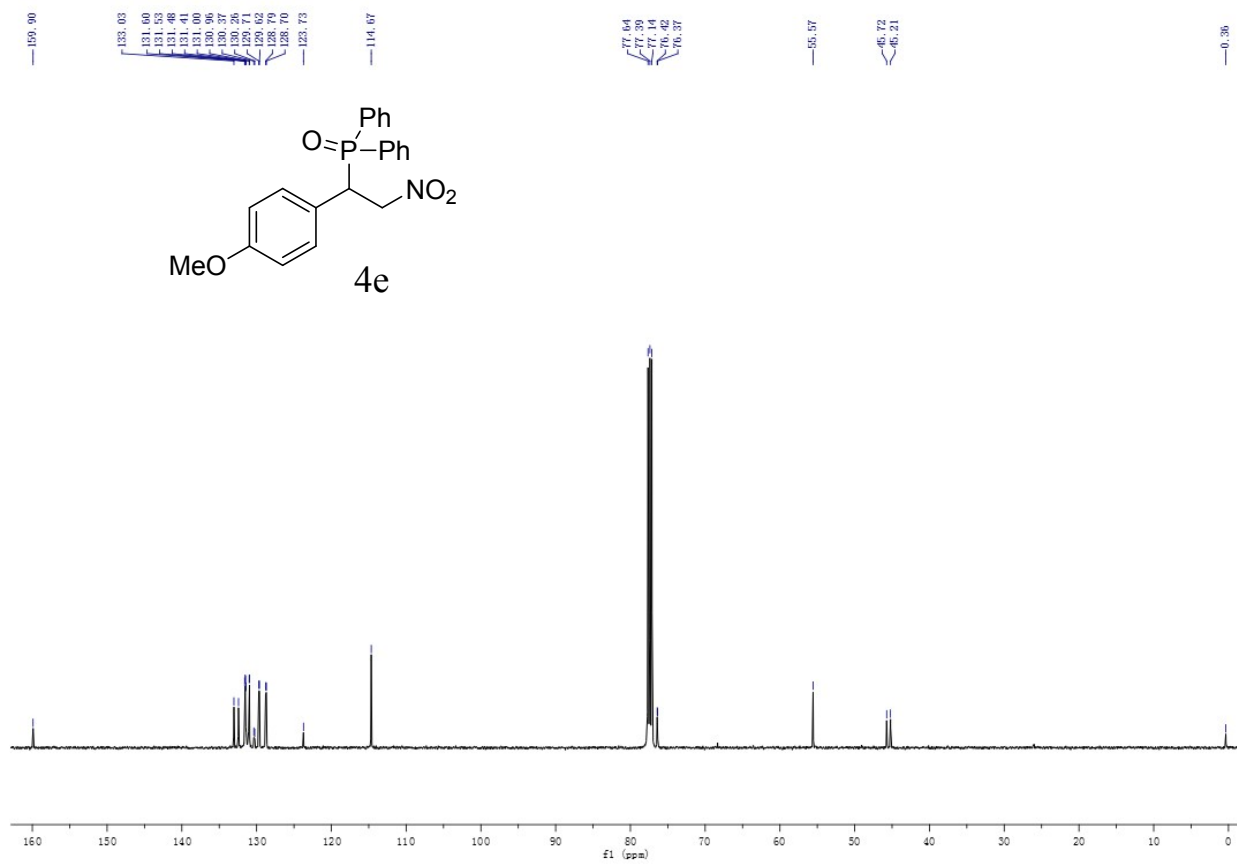

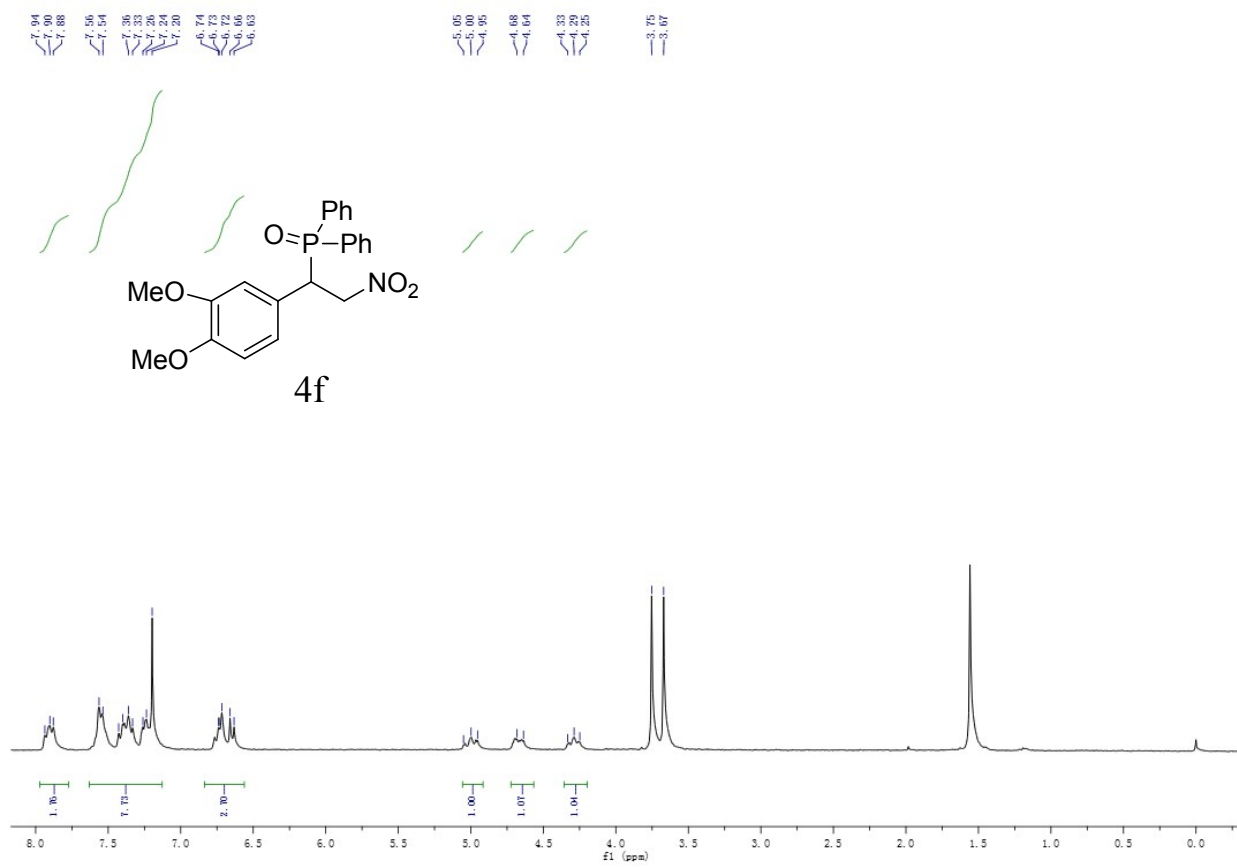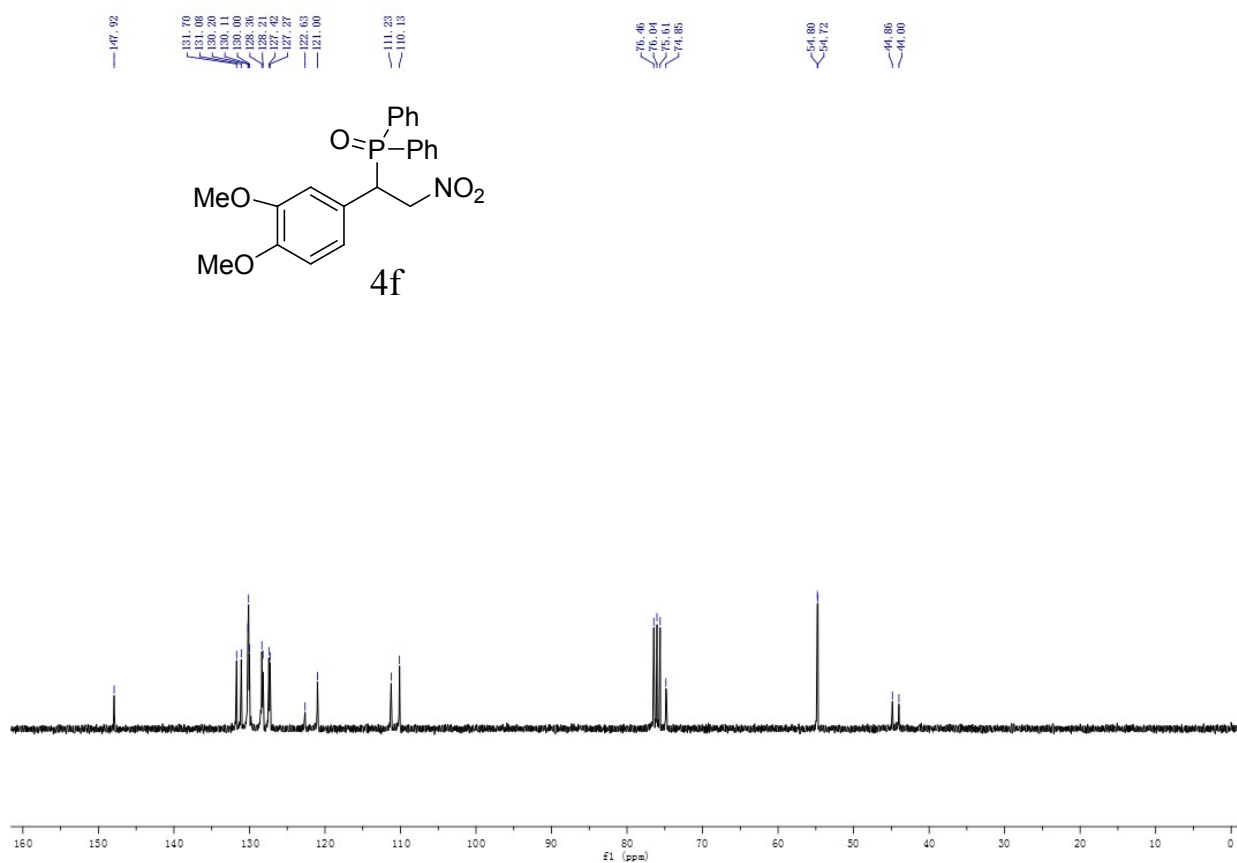

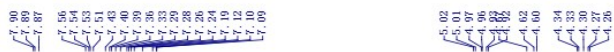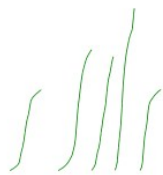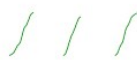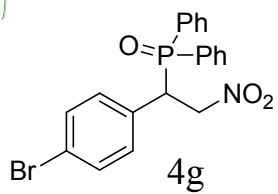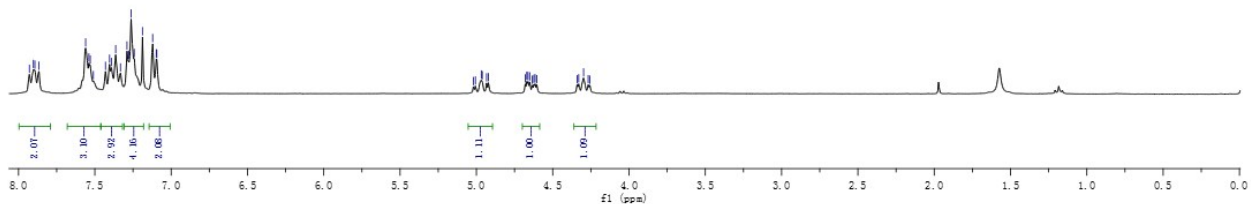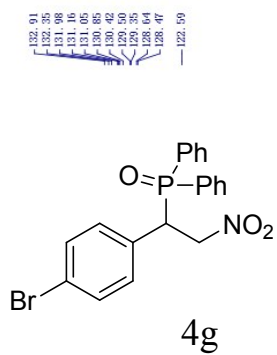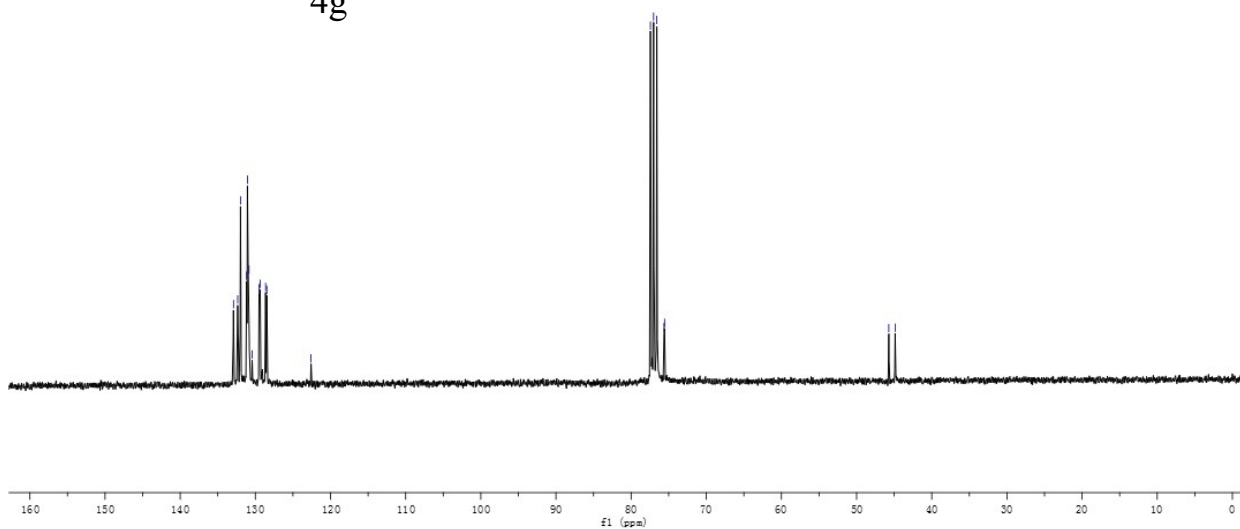



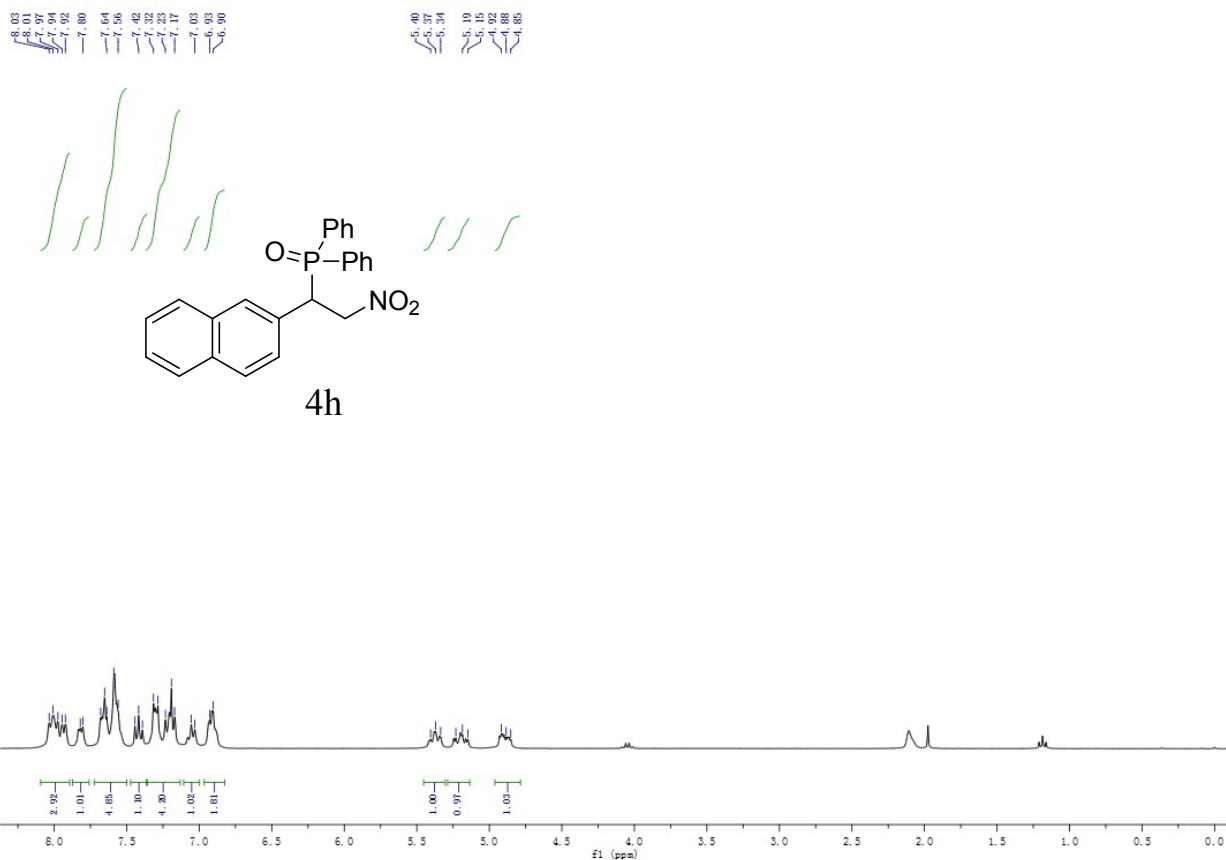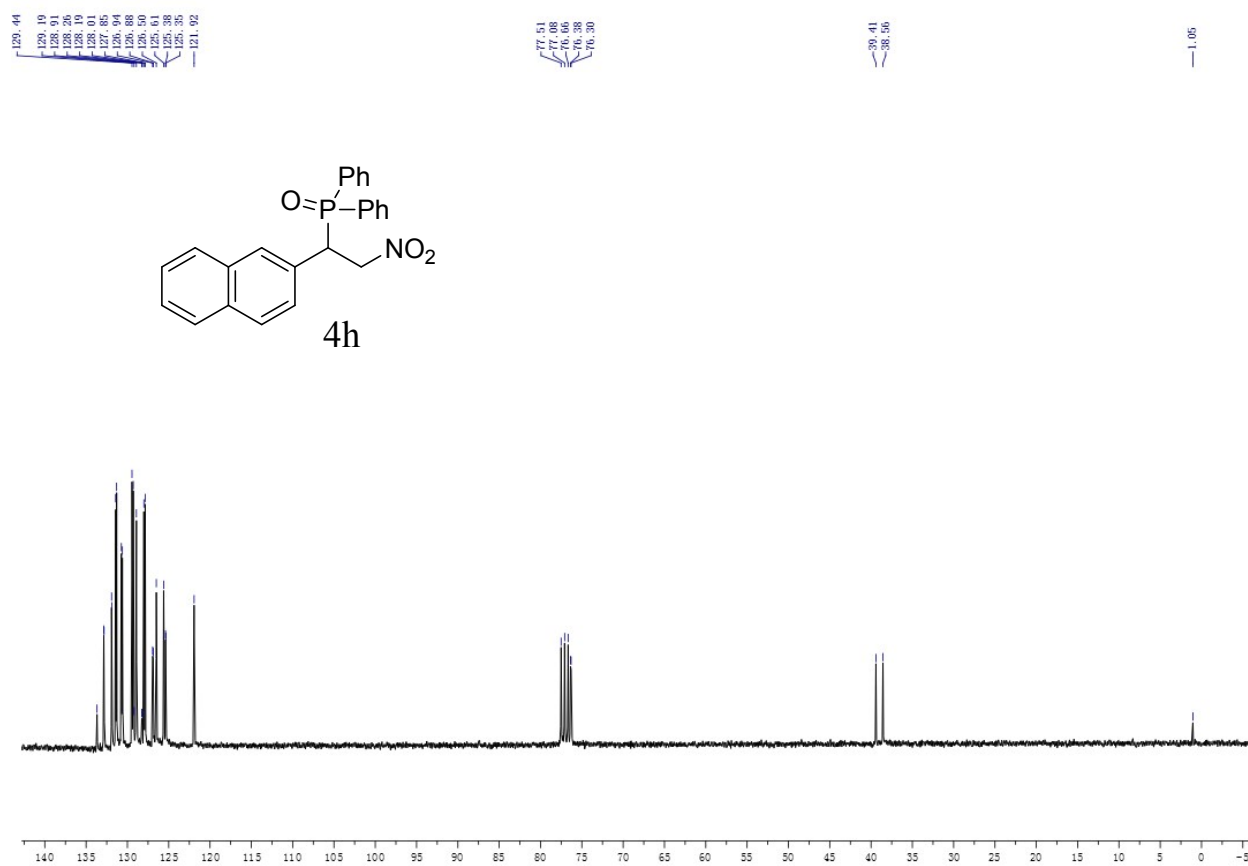

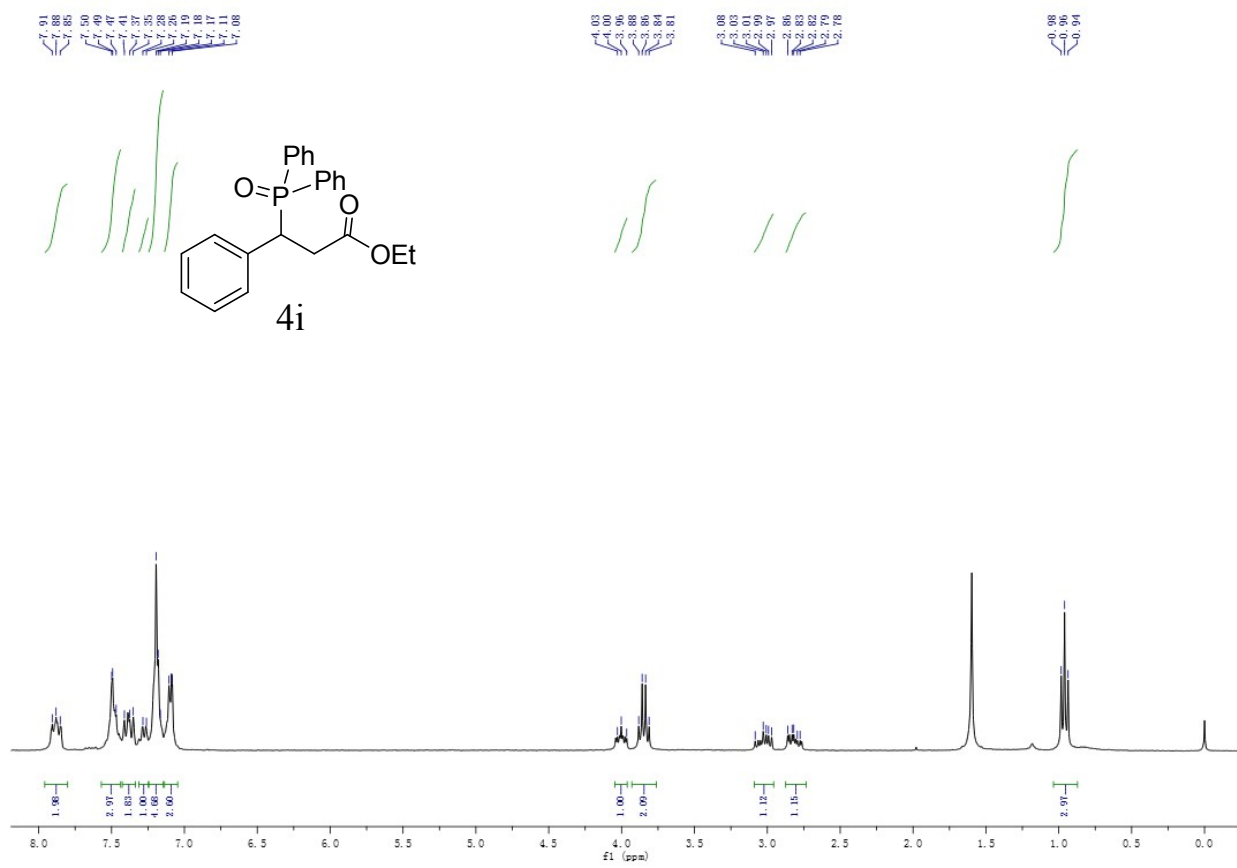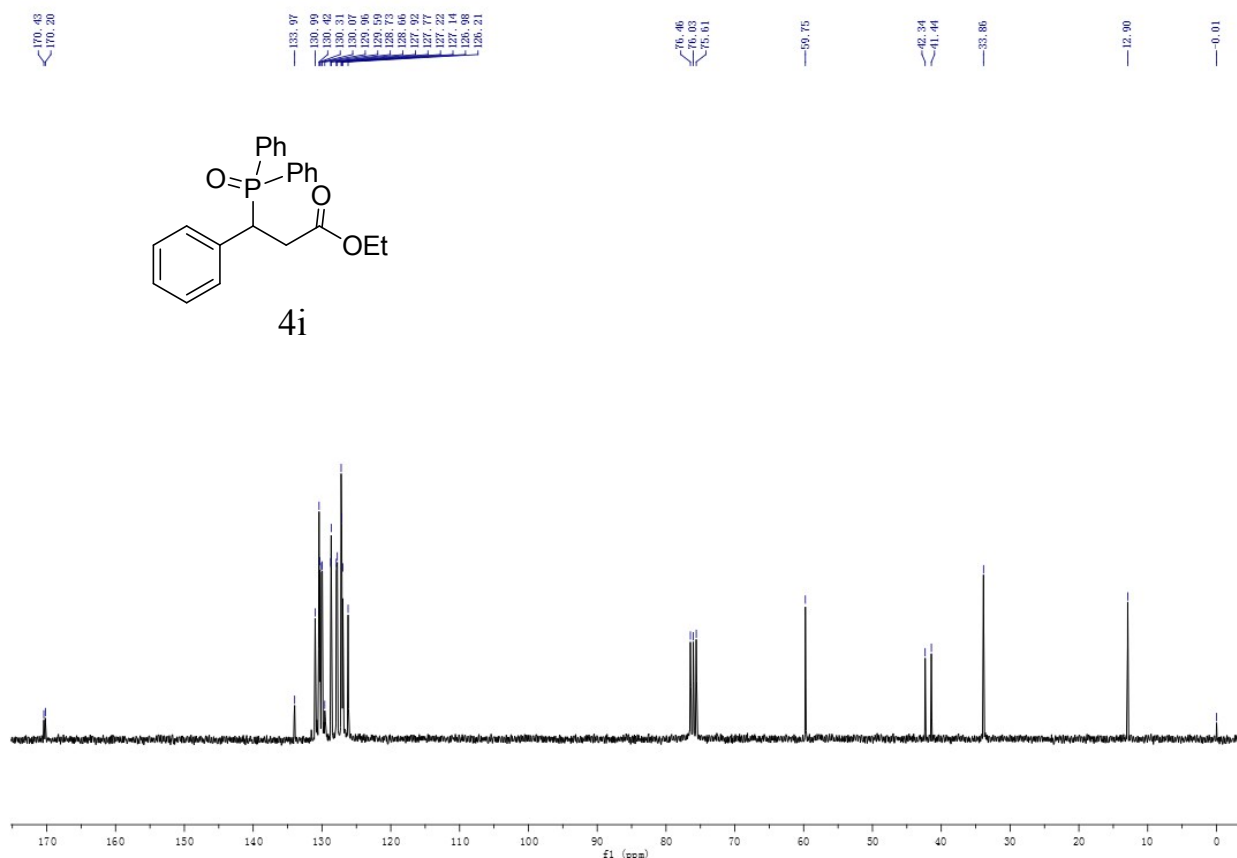

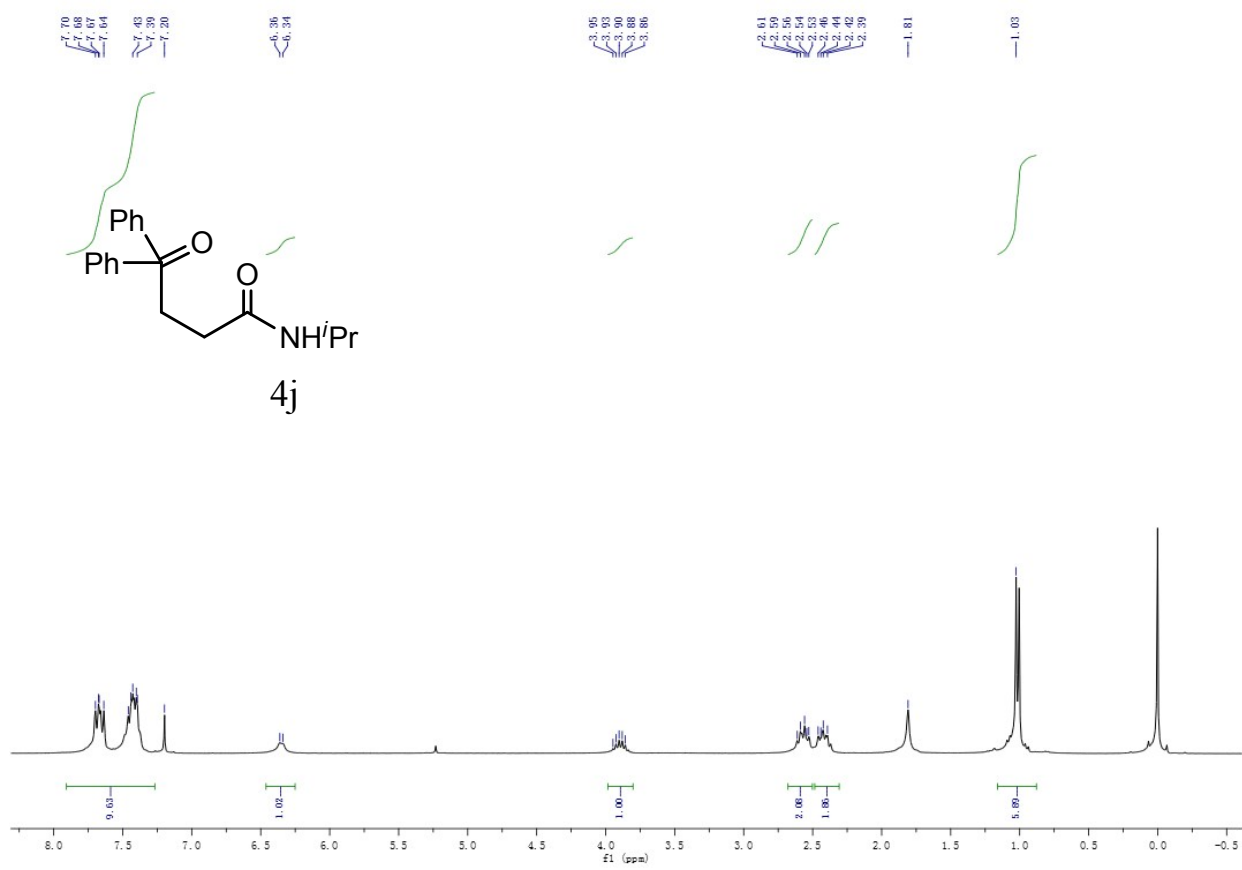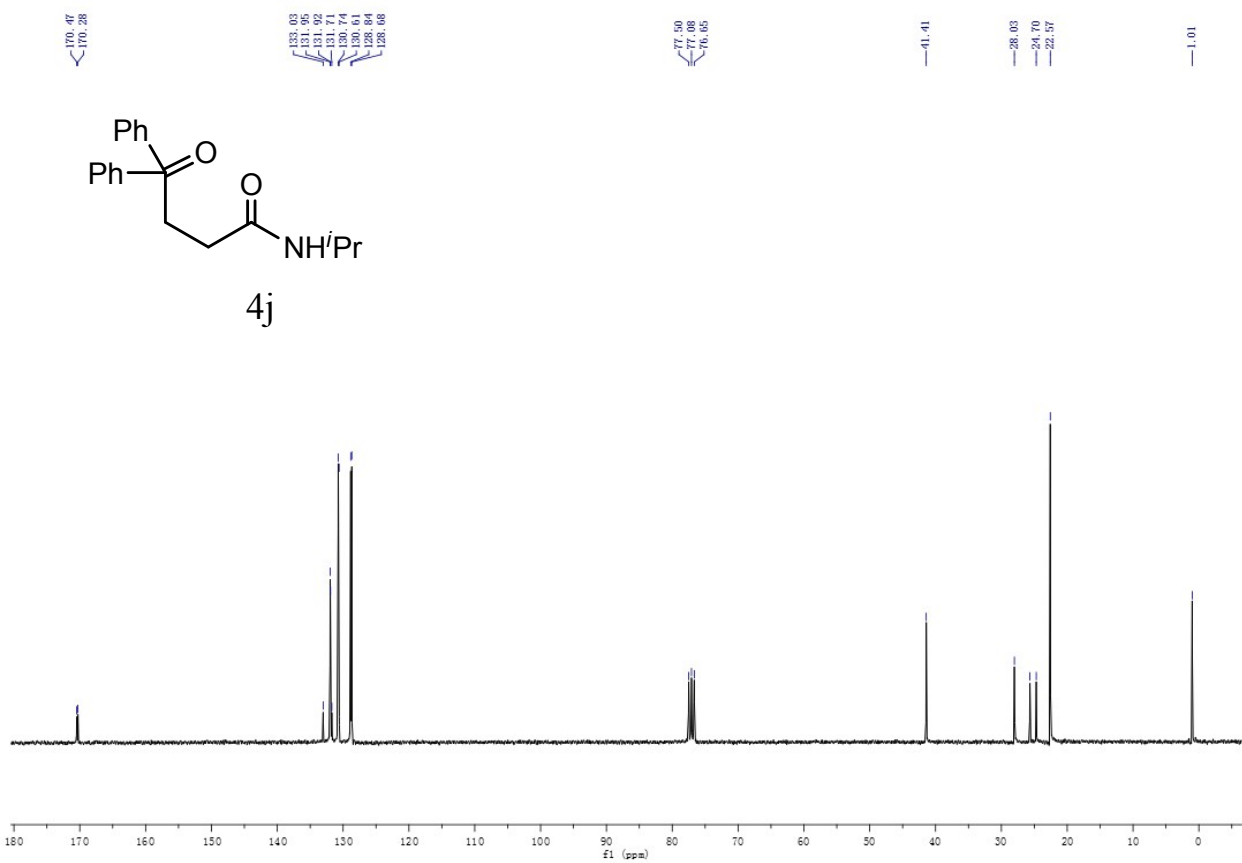

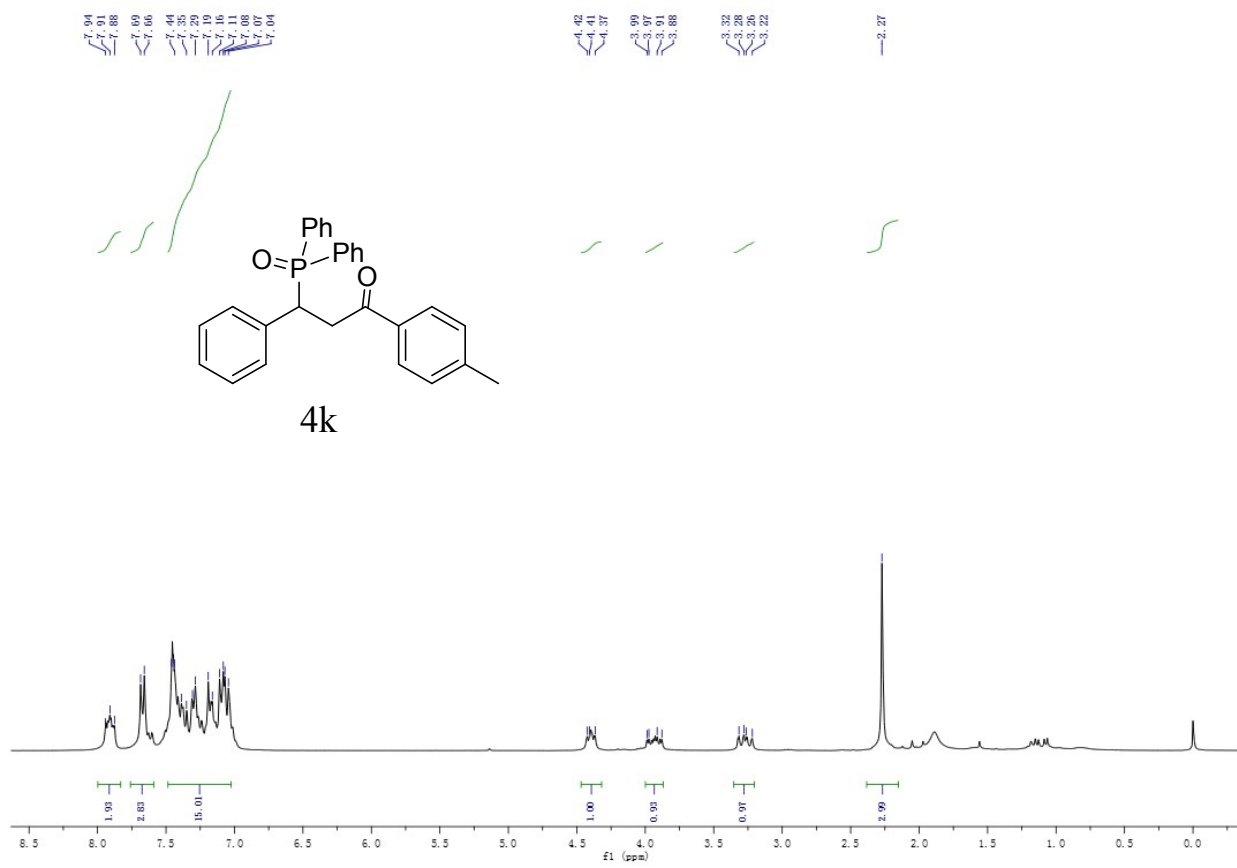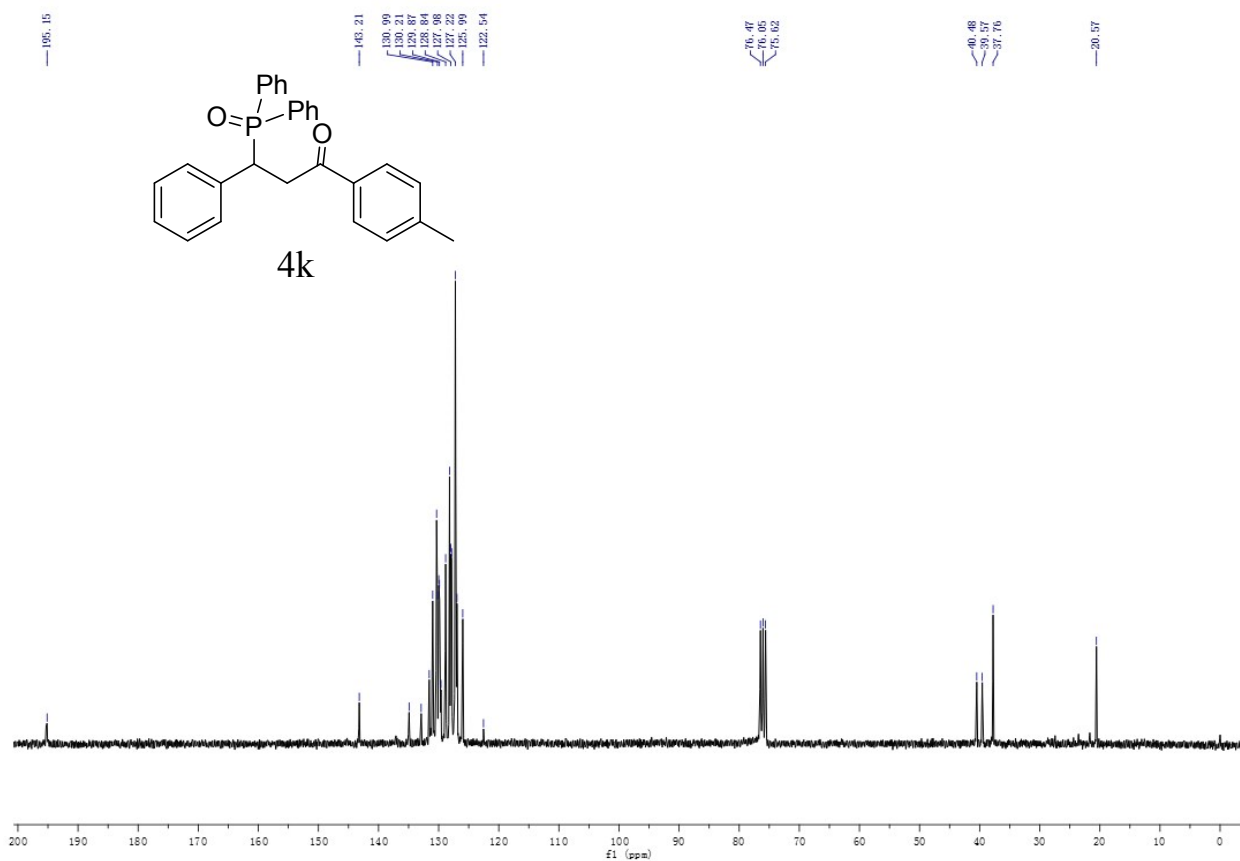

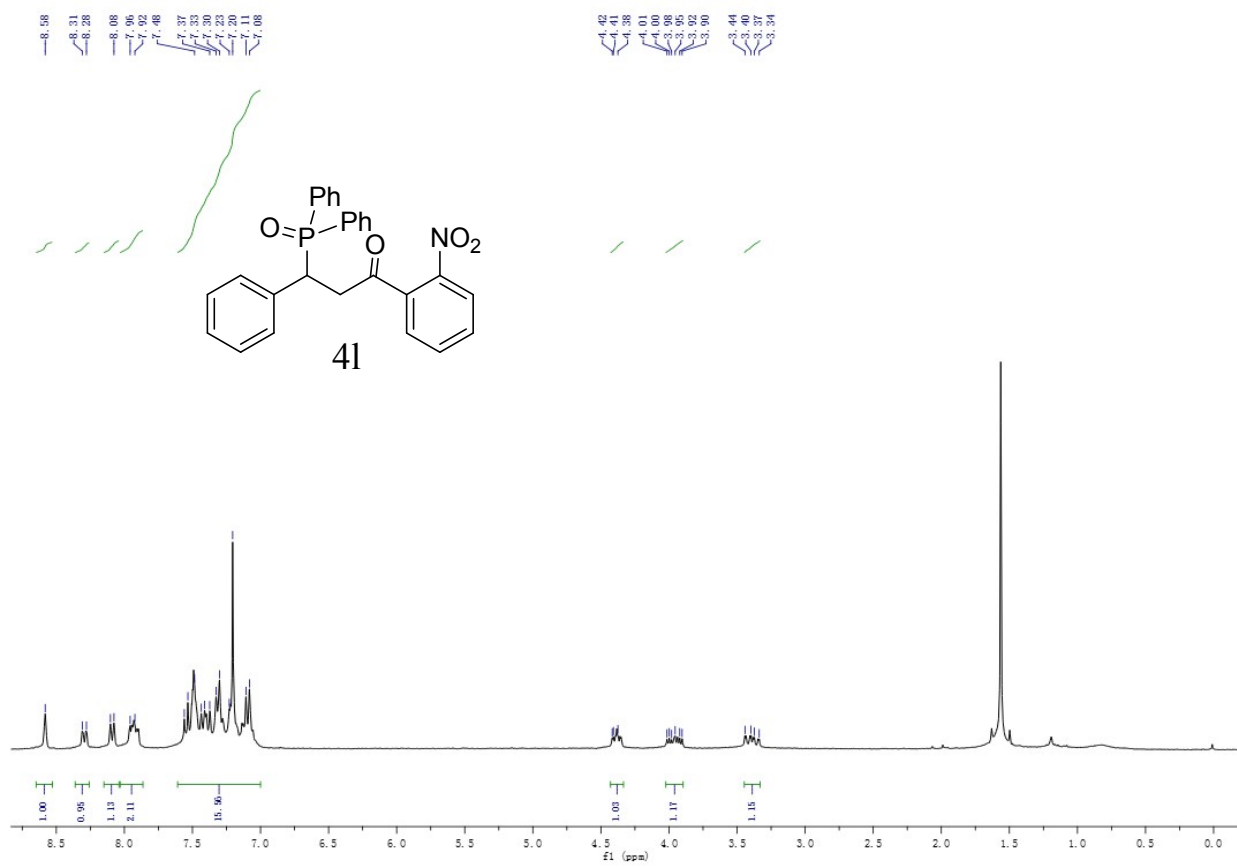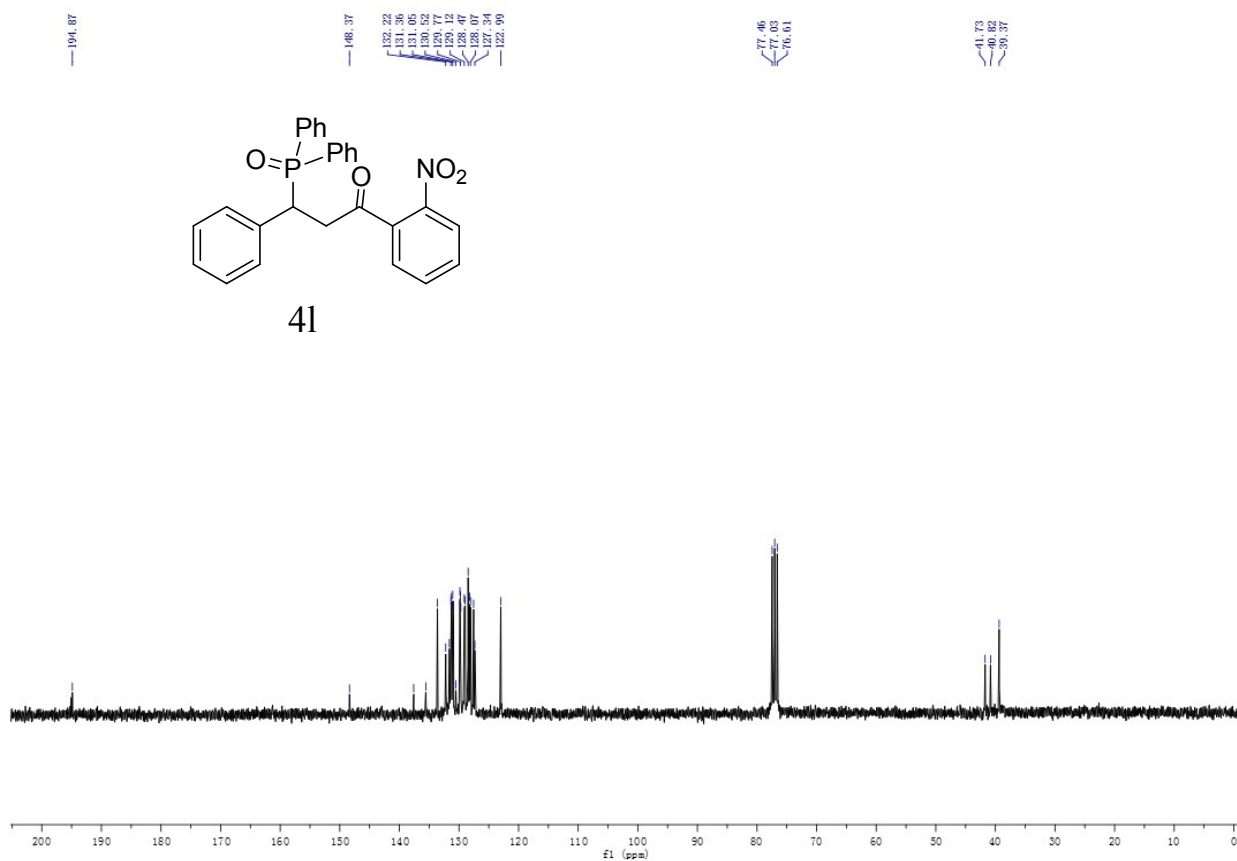

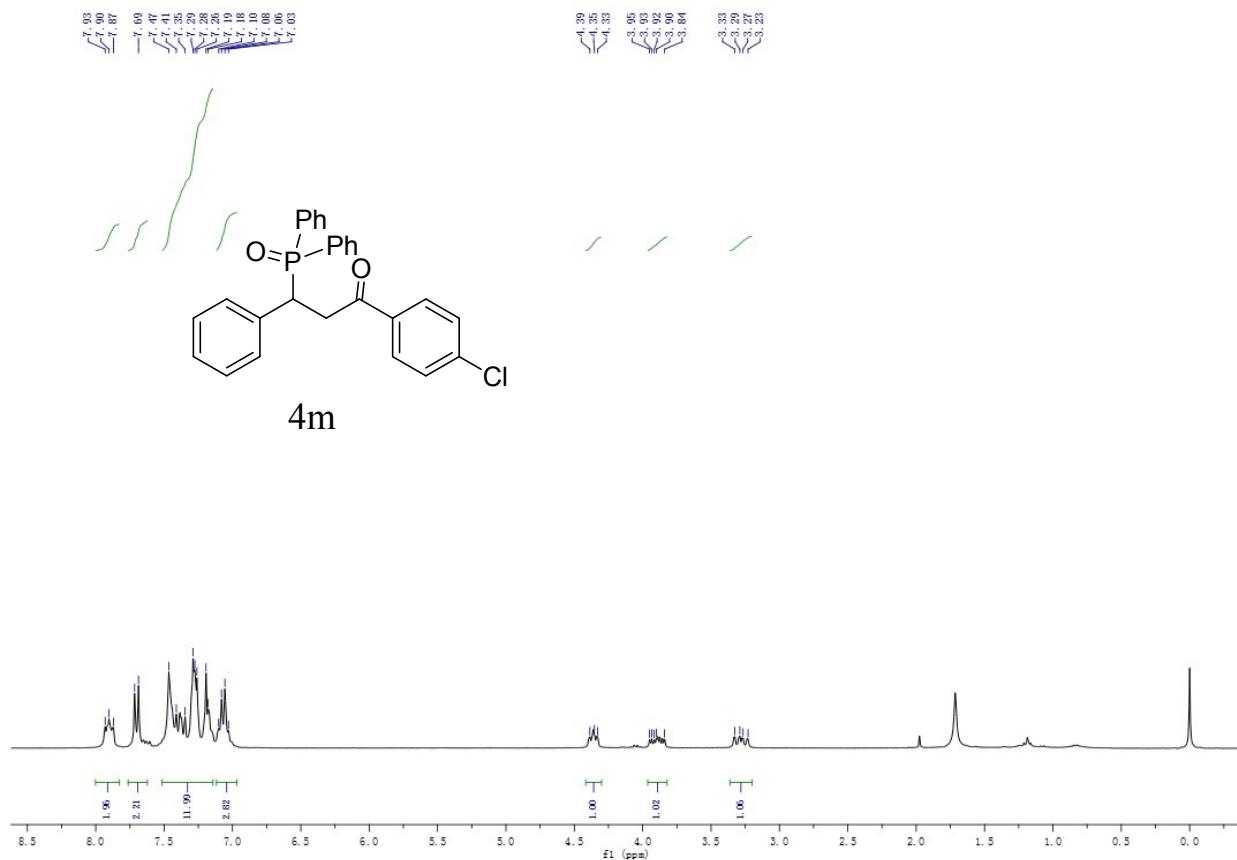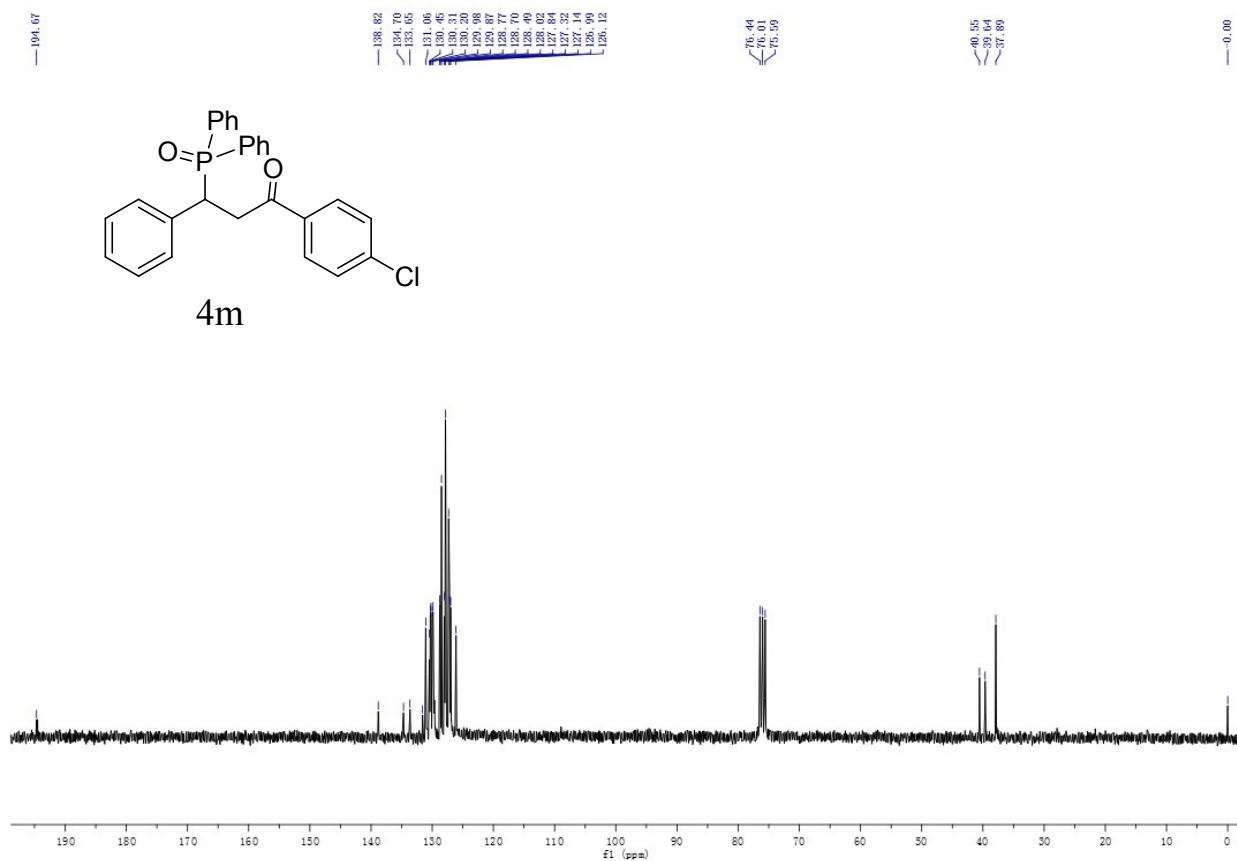

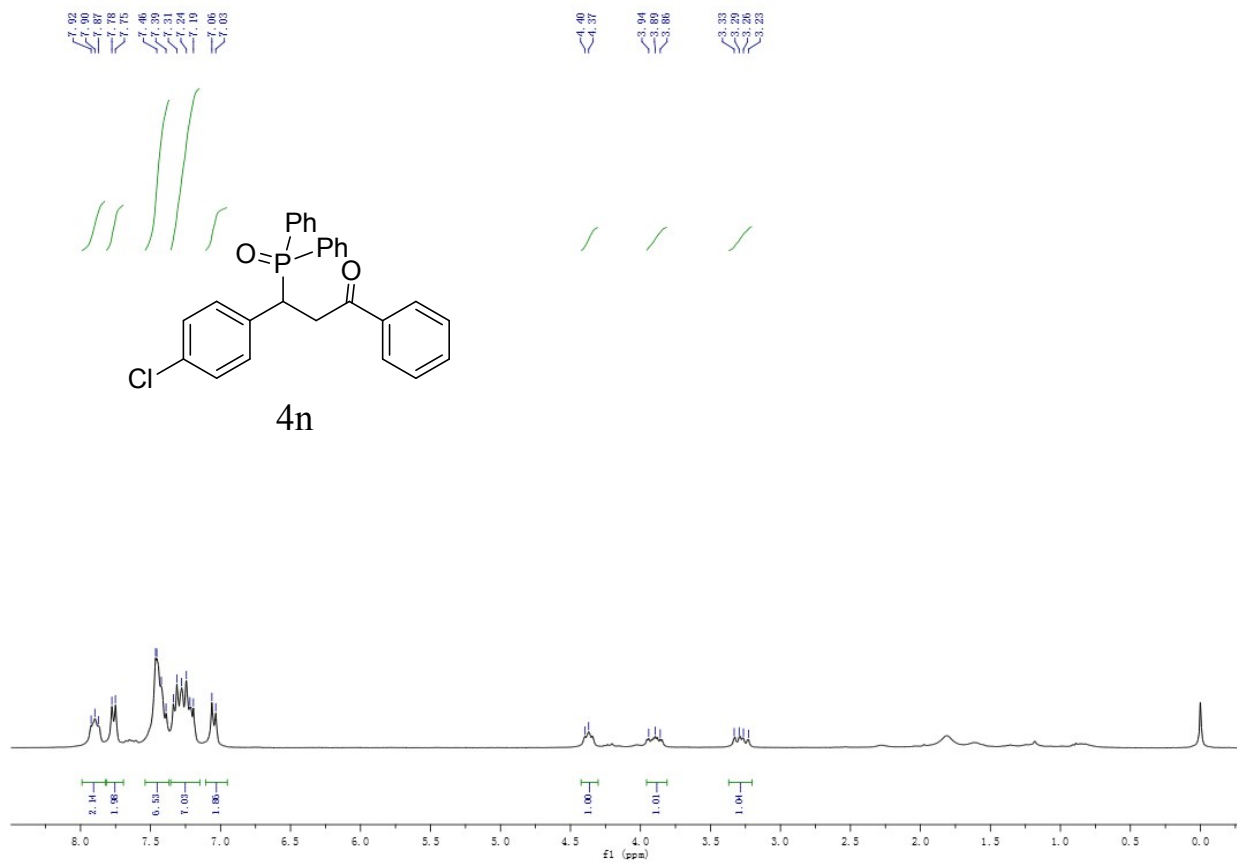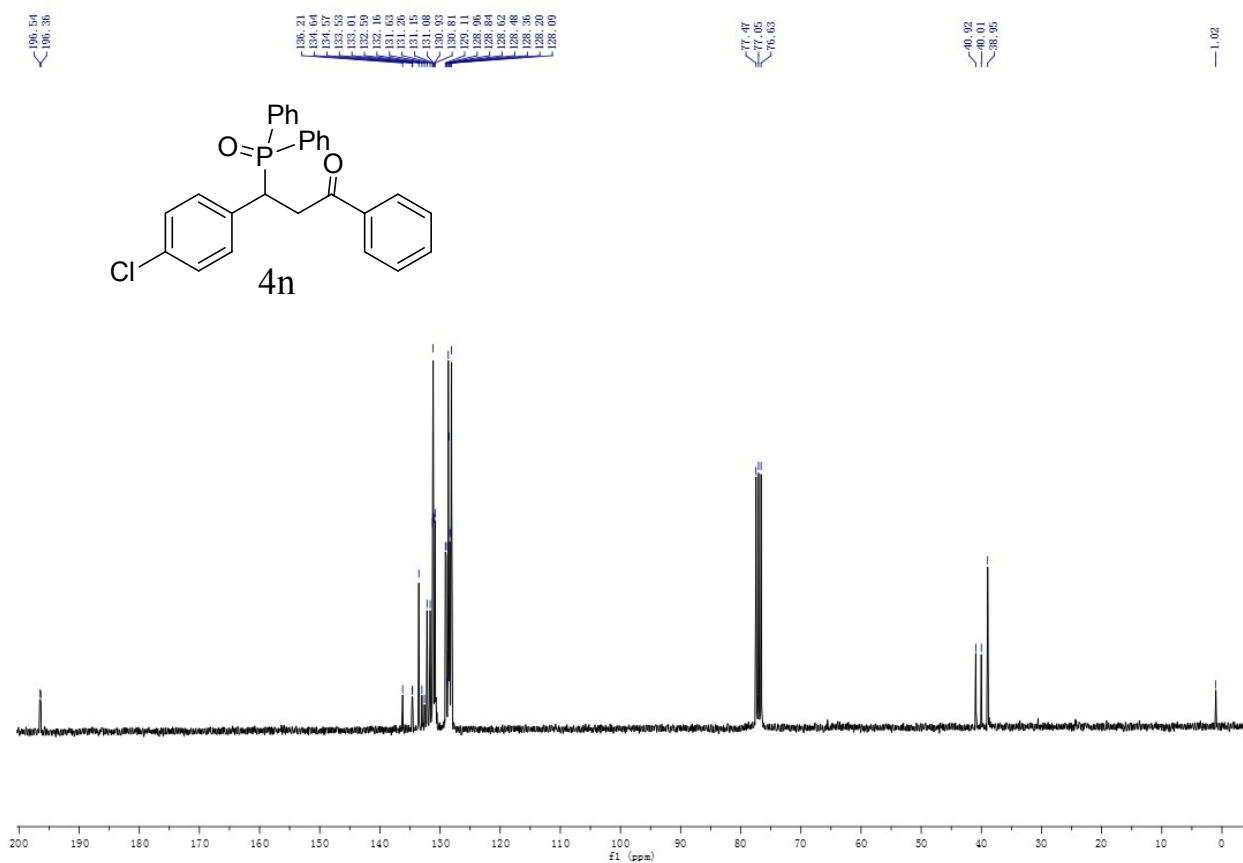

## V. Crystallographic Data for Complexes **1a-d**

| Crustal data                                                                                    | <b>1a</b>                                                        | <b>1b</b>                                                        | <b>1c</b>                                                         | <b>1d</b>                                                        |
|-------------------------------------------------------------------------------------------------|------------------------------------------------------------------|------------------------------------------------------------------|-------------------------------------------------------------------|------------------------------------------------------------------|
| Empirica formula                                                                                | C <sub>42</sub> H <sub>68</sub> N <sub>5</sub> NdSi <sub>2</sub> | C <sub>42</sub> H <sub>68</sub> DyN <sub>5</sub> Si <sub>2</sub> | C <sub>42</sub> H <sub>68</sub> N <sub>5</sub> Si <sub>2</sub> Yb | C <sub>42</sub> H <sub>68</sub> N <sub>5</sub> Si <sub>2</sub> Y |
| Crystal system                                                                                  | Orthorhombic                                                     | Orthorhombic                                                     | Orthorhombic                                                      | Orthorhombic                                                     |
| Space group                                                                                     | P2 <sub>1</sub> 2 <sub>1</sub> 2 <sub>1</sub>                    | P2 <sub>1</sub> 2 <sub>1</sub> 2 <sub>1</sub>                    | P2 <sub>1</sub> 2 <sub>1</sub> 2 <sub>1</sub>                     | P2 <sub>1</sub> 2 <sub>1</sub> 2 <sub>1</sub>                    |
| a (Å)                                                                                           | 12.4507(11)                                                      | 12.7402(9)                                                       | 12.5546(11)                                                       | 12.7235(11)                                                      |
| b (Å)                                                                                           | 16.3478(15)                                                      | 15.6814(11)                                                      | 15.7504(14)                                                       | 15.6788(14)                                                      |
| c (Å)                                                                                           | 22.550(2)                                                        | 22.7852(16)                                                      | 22.813(2)                                                         | 22.7752(19)                                                      |
| α (°)                                                                                           | 90                                                               | 90                                                               | 90                                                                | 90                                                               |
| β (°)                                                                                           | 90                                                               | 90                                                               | 90                                                                | 90                                                               |
| γ (°)                                                                                           | 90                                                               | 90                                                               | 90                                                                | 90                                                               |
| V (Å <sup>3</sup> )                                                                             | 4589.9(7)                                                        | 4552.1(6)                                                        | 4511.1(7)                                                         | 4543.4(7)                                                        |
| T (K)                                                                                           | 293(2)                                                           | 293(2)                                                           | 293(2)                                                            | 293(2)                                                           |
| D <sub>calc</sub> (g cm <sup>-3</sup> )                                                         | 1.221                                                            | 1.257                                                            | 1.284                                                             | 1.152                                                            |
| Z                                                                                               | 4                                                                | 4                                                                | 4                                                                 | 4                                                                |
| F(0 0 0)                                                                                        | 1772                                                             | 1796                                                             | 1812                                                              | 1688                                                             |
| Reflections collected                                                                           | 39779                                                            | 39442                                                            | 38677                                                             | 32120                                                            |
| Number of unique reflections<br>( <i>R</i> <sub>int</sub> )                                     | 10517(0.0299)                                                    | 10562(0.0280)                                                    | 10314(0.0331)                                                     | 7947(0.0572)                                                     |
| Number of parameters                                                                            | 465                                                              | 465                                                              | 465                                                               | 465                                                              |
| λ (Mo Kα radiation) (Å)                                                                         | 0.71073                                                          | 0.71073                                                          | 0.71073                                                           | 0.71073                                                          |
| μ (mm <sup>-1</sup> )                                                                           | 1.215                                                            | 1.726                                                            | 2.159                                                             | 1.368                                                            |
| θ Range (°)                                                                                     | 1.54 - 27.57                                                     | 1.58 - 27.65                                                     | 1.57 - 27.49                                                      | 1.58 - 25.00                                                     |
| Goodness-of-fit (GOF)                                                                           | 1.049                                                            | 1.023                                                            | 1.030                                                             | 1.010                                                            |
| Final R indices [ <i>I</i> > 2σ ( <i>I</i> ); <i>R</i> <sub>1</sub> ,<br><i>wR</i> <sub>2</sub> | 0.0318, 0.0748                                                   | 0.0279, 0.0637                                                   | 0.0445, 0.1215                                                    | 0.0426, 0.0899                                                   |
| R indices (all data); <i>R</i> <sub>1</sub> , <i>wR</i> <sub>2</sub>                            | 0.0393, 0.0791                                                   | 0.0363, 0.0677                                                   | 0.0516, 0.1273                                                    | 0.0774, 0.1031                                                   |
| Largest difference in peak and<br>hole (e Å <sup>-3</sup> )                                     | 0.284 and -1.056                                                 | 0.580 and -0.479                                                 | 0.353 and -1.003                                                  | 0.212 and -0.340                                                 |
